# Supplementary material for: Salivary Matrix Metalloproteinase-8 and -9 and Myeloperoxidase in Relation to Coronary Heart and Periodontal Diseases: A Subgroup Report from the PAROKRANK Study (Periodontitis and Its Relation to Coronary Artery Disease)
Source: PubMed Central journal article supplement (PMC4488442; doi:10.1371/journal.pone.0126370), 2015-07-01
Supplement: pone.0126370.s001.pdf [file pone.0126370.s001.pdf]

| Group | Sex | Age | Smoking | Snuffing | Hypertens | Diabetes | ACEI | ASA |
|-------|-----|-----|---------|----------|-----------|----------|------|-----|
| 0     | 1   | 61  | 1       | 0        | 0         | 0        | 1    | 1   |
| 0     | 1   | 64  | 1       | 0        | 0         | 0        | 1    | 1   |
| 0     | 1   | 62  | 1       | 0        | 0         | 0        | 0    | 1   |
| 0     | 1   | 50  | 3       | 0        |           |          | 0    | 1   |
| 0     | 1   | 61  | 3       | 0        | 1         | 0        | 1    | 1   |
| 0     | 1   | 63  | 1       | 1        | 1         | 0        | 1    | 1   |
| 0     | 1   | 50  | 1       | 1        | 1         | 0        | 0    | 1   |
| 0     | 1   | 62  | 3       | 0        | 1         | 0        | 0    | 1   |
| 0     | 1   | 65  | 3       | 0        | 1         | 0        | 1    | 1   |
| 0     | 1   | 40  | 1       | 0        | 0         | 0        | 1    | 1   |
| 0     | 1   | 49  | 1       | 0        | 0         | 0        | 0    | 0   |
| 0     | 1   | 52  | 1       | 1        | 0         | 0        | 0    | 1   |
| 0     | 1   | 45  | 1       | 0        | 0         | 0        | 1    | 1   |
| 0     | 1   | 41  | 1       | 1        | 1         | 0        | 0    | 1   |
| 0     | 1   | 67  | 1       | 1        | 1         | 0        | 1    | 1   |
| 0     | 1   | 65  | 1       | 0        | 0         | 0        | 1    | 1   |
| 0     | 2   | 53  | 1       | 0        | 1         | 0        | 1    | 1   |
| 0     | 1   | 49  | 1       | 0        | 0         | 0        | 1    | 1   |
| 0     | 1   | 62  | 3       | 0        | 0         | 0        | 1    | 1   |
| 0     | 2   | 63  | 1       | 0        | 0         | 0        | 0    | 1   |
| 0     | 1   | 58  | 1       | 0        | 0         | 0        | 1    | 1   |
| 0     | 2   | 67  | 1       | 0        | 0         | 0        | 0    | 1   |
| 0     | 1   | 65  | 3       | 0        | 0         | 9        | 0    | 1   |
| 0     | 1   | 64  | 3       | 0        | 0         | 0        | 1    | 1   |
| 0     | 1   | 64  | 1       | 0        | 1         | 1        | 0    | 1   |
| 0     | 1   | 65  | 1       | 0        | 1         | 0        | 1    | 1   |
| 0     | 1   | 67  | 1       | 0        | 1         | 0        | 1    | 1   |
| 0     | 1   | 65  | 2       | 0        | 1         | 0        | 1    | 1   |
| 0     | 1   | 58  | 3       | 0        | 1         | 0        | 0    | 1   |
| 0     | 1   | 47  | 2       | 0        | 1         | 0        | 0    | 1   |
| 0     | 1   | 47  | 1       | 1        | 0         | 0        | 0    | 1   |
| 0     | 1   | 55  | 3       | 0        | 0         | 0        | 1    | 1   |
| 0     | 1   | 51  | 2       | 2        | 0         | 0        | 1    | 1   |
| 0     | 1   | 70  | 3       | 0        | 0         | 0        | 0    | 1   |
| 0     | 1   | 58  | 3       | 0        | 0         | 0        | 1    | 1   |
| 0     | 1   | 57  | 3       | 0        | 1         | 0        | 1    | 1   |
| 0     | 2   | 66  | 3       | 0        | 0         | 0        | 0    | 1   |
| 0     | 2   | 65  | 1       | 0        | 1         | 0        | 1    | 1   |
| 0     | 1   | 61  | 1       | 0        | 1         | 0        | 0    | 0   |
| 0     | 1   | 66  | 1       | 1        | 0         | 0        | 0    | 0   |
| 0     | 1   | 44  | 1       | 0        | 0         | 0        | 0    | 0   |
| 0     | 1   | 63  | 1       | 0        | 0         | 0        | 0    | 0   |
| 0     | 2   | 55  | 1       | 0        | 0         | 0        | 0    | 1   |
| 0     | 2   | 64  | 4       | 0        | 1         | 1        | 0    | 1   |
| 0     | 2   | 72  | 1       | 0        | 0         | 0        | 0    | 0   |
| 0     | 1   | 68  | 1       | 0        | 0         | 0        | 0    | 0   |
| 0     | 1   | 59  | 3       | 0        | 1         | 1        | 0    | 1   |
| 0     | 1   | 72  | 3       | 0        | 0         | 0        | 0    | 0   |
| 0     | 1   | 54  | 3       | 0        | 0         | 0        | 0    | 0   |

|   |   |    |   |   |   |   |   |   |
|---|---|----|---|---|---|---|---|---|
| 0 | 1 | 56 | 2 | 0 | 0 | 0 | 0 | 0 |
| 0 | 1 | 63 | 3 | 2 | 0 | 0 | 0 | 0 |
| 0 | 1 | 56 | 1 | 0 | 0 | 0 | 0 | 0 |
| 0 | 1 | 66 | 2 | 0 | 0 | 1 | 0 | 0 |
| 0 | 1 | 59 | 3 | 0 | 1 | 9 | 1 | 1 |
| 0 | 1 | 62 | 1 | 2 | 0 | 0 | 0 | 0 |
| 0 | 1 | 55 | 3 | 0 | 0 | 0 | 0 | 0 |
| 0 | 1 | 62 | 3 | 0 | 0 | 0 | 0 | 0 |
| 0 | 1 | 60 | 3 | 0 | 0 | 0 | 0 | 0 |
| 0 | 1 | 55 | 3 | 0 | 0 | 0 | 0 | 0 |
| 0 | 1 | 74 | 3 | 0 | 0 | 0 | 0 | 0 |
| 0 | 2 | 64 | 1 | 0 | 0 | 0 | 0 | 0 |
| 0 | 1 | 63 | 1 | 1 | 0 | 0 | 0 | 0 |
| 0 | 2 | 53 | 2 | 0 | 0 | 0 | 0 | 0 |
| 0 | 1 | 50 | 1 | 1 | 0 | 0 | 0 | 0 |
| 0 | 1 | 67 | 1 | 0 | 1 | 0 | 1 | 1 |
| 0 | 1 | 46 | 1 | 1 | 0 | 1 | 0 | 1 |
| 0 | 2 | 72 | 1 | 0 | 0 | 0 | 0 | 0 |
| 0 | 1 | 71 | 3 | 0 | 0 | 0 | 0 | 0 |
| 0 | 1 | 73 | 3 | 0 | 0 | 0 | 0 | 0 |
| 0 | 1 | 57 | 3 | 0 | 0 | 0 | 0 | 0 |
| 0 | 1 | 64 | 1 | 0 | 0 | 0 | 0 | 0 |
| 0 | 1 | 60 | 1 | 1 | 1 | 0 | 0 | 1 |
| 0 | 1 | 53 | 3 | 0 | 1 | 0 | 1 | 1 |
| 0 | 1 | 44 | 2 | 2 | 0 | 0 | 0 | 0 |
| 0 | 1 | 65 | 1 | 0 | 1 | 0 | 0 | 0 |
| 0 | 1 | 74 | 1 | 0 | 1 | 0 | 0 | 1 |
| 0 | 1 | 69 | 1 | 0 | 0 | 0 | 1 | 1 |
| 0 | 1 | 28 | 2 | 0 | 0 | 0 | 1 | 1 |
| 0 | 1 | 70 | 1 | 0 | 1 | 0 | 1 | 1 |
| 0 | 1 | 70 | 1 | 0 | 0 | 0 | 1 | 1 |
| 0 | 1 | 65 | 2 | 2 | 1 | 1 | 0 | 1 |
| 0 | 2 | 68 | 3 | 0 | 1 | 1 | 0 | 1 |
| 0 | 1 | 52 | 3 | 0 | 0 | 1 | 0 | 1 |
| 0 | 1 | 60 | 1 | 0 | 1 | 0 | 0 | 1 |
| 0 | 1 | 63 | 2 | 2 | 0 | 0 | 0 | 1 |
| 0 | 1 | 69 | 3 | 0 | 0 | 0 | 0 | 1 |
| 0 | 1 | 70 | 3 | 0 | 1 | 0 | 1 | 1 |
| 0 | 1 | 62 | 2 | 0 | 1 | 0 | 1 | 1 |
| 0 | 1 | 67 | 4 | 2 | 1 | 0 | 0 | 1 |
| 0 | 1 | 71 | 2 | 0 | 0 | 0 | 1 | 1 |
| 0 | 1 | 48 | 2 | 0 | 0 | 0 | 1 | 1 |
| 0 | 1 | 60 | 2 | 1 | 1 | 0 | 1 | 1 |
| 0 | 2 | 56 | 3 | 0 | 0 | 1 | 1 | 1 |
| 0 | 1 | 64 | 1 | 0 | 0 | 0 | 0 | 1 |
| 0 | 2 | 68 | 1 | 0 | 0 | 0 | 0 | 1 |
| 0 | 1 | 64 | 1 | 1 | 0 | 0 | 0 | 1 |
| 0 | 2 | 68 | 3 | 0 | 0 | 0 | 1 | 1 |
| 0 | 1 | 57 | 1 | 0 | 0 | 0 | 1 | 1 |
| 0 | 1 | 62 | 1 | 0 | 0 | 0 | 0 | 1 |

|   |   |    |   |   |   |   |   |   |
|---|---|----|---|---|---|---|---|---|
| 0 | 1 | 65 | 2 | 0 | 0 | 0 | 1 | 1 |
| 0 | 2 | 56 | 3 | 0 | 1 | 0 | 1 | 1 |
| 0 | 1 | 68 | 2 | 0 | 0 | 0 | 1 | 1 |
| 0 | 1 | 59 | 1 | 0 | 1 | 1 | 1 | 1 |
| 0 | 1 | 63 | 1 | 0 | 1 | 0 | 1 | 1 |
| 0 | 1 | 56 | 1 | 0 | 1 | 0 | 1 | 1 |
| 0 | 1 | 70 | 1 | 0 | 0 | 0 | 1 | 1 |
| 0 | 2 | 65 | 3 | 0 | 1 | 0 | 1 | 0 |
| 0 | 1 | 69 | 3 | 0 | 0 | 0 | 0 | 0 |
| 0 | 1 | 63 | 3 | 0 | 1 | 0 | 1 | 0 |
| 0 | 2 | 67 | 1 | 0 | 0 | 0 | 0 | 0 |
| 0 | 1 | 46 | 1 | 1 | 1 | 1 | 0 | 0 |
| 0 | 1 | 67 | 1 | 1 | 0 | 0 | 0 | 0 |
| 0 | 1 | 65 | 1 | 0 | 1 | 0 | 0 | 0 |
| 0 | 1 | 65 | 3 | 0 | 0 | 0 | 0 | 0 |
| 0 | 1 | 59 | 1 | 0 | 1 | 0 | 1 | 0 |
| 0 | 1 | 62 | 1 | 0 | 0 | 0 | 0 | 0 |
| 0 | 1 | 60 | 1 | 1 | 1 | 0 | 0 | 1 |
| 0 | 1 | 56 | 1 | 0 | 0 | 0 | 0 | 0 |
| 0 | 1 | 57 | 2 | 2 | 0 | 0 | 0 | 0 |
| 0 | 1 | 48 | 3 | 0 | 0 | 0 | 0 | 0 |
| 0 | 1 | 60 | 2 | 0 | 0 | 0 | 0 | 0 |
| 0 | 2 | 68 | 1 | 0 | 0 | 0 | 0 | 0 |
| 0 | 1 | 50 | 1 | 0 | 1 | 0 | 0 | 0 |
| 0 | 1 | 63 | 2 | 0 | 1 | 0 | 1 | 0 |
| 0 | 1 | 63 | 3 | 0 | 1 | 0 | 0 | 0 |
| 0 | 1 | 68 | 1 | 0 | 1 | 0 | 1 | 0 |
| 0 | 1 | 73 | 3 | 0 | 0 | 0 | 0 | 0 |
| 0 | 1 | 56 | 3 | 0 | 1 | 0 | 1 | 0 |
| 0 | 2 | 61 | 1 | 0 | 0 | 0 | 0 | 0 |
| 0 | 1 | 51 | 1 | 0 | 1 | 0 | 0 | 0 |
| 0 | 1 | 65 | 1 | 0 | 9 | 0 | 0 | 0 |
| 0 | 1 | 64 | 1 | 0 | 0 | 0 | 0 | 0 |
| 0 | 1 | 67 | 1 | 0 | 0 | 0 | 0 | 0 |
| 0 | 1 | 50 | 1 | 1 | 1 | 1 | 1 | 0 |
| 0 | 1 | 61 | 3 | 0 | 0 | 0 | 0 | 0 |
| 0 | 1 | 67 | 1 | 1 | 0 | 0 | 0 | 0 |
| 0 | 1 | 65 | 1 | 0 | 1 | 0 | 1 | 1 |
| 0 | 1 | 72 | 3 | 0 | 1 | 0 | 0 | 0 |
| 0 | 1 | 52 | 4 | 1 | 0 | 0 | 1 | 1 |
| 0 | 1 | 69 | 1 | 0 | 0 | 0 | 0 | 1 |
| 0 | 1 | 64 | 1 | 0 | 1 | 0 | 1 | 1 |
| 0 | 1 | 57 | 1 | 0 | 0 | 0 | 1 | 1 |
| 0 | 1 | 70 | 1 | 0 | 0 | 0 | 1 | 1 |
| 0 | 2 | 70 | 3 | 0 | 0 | 0 | 0 | 1 |
| 0 | 1 | 38 | 1 | 1 | 1 | 0 | 1 | 1 |
| 0 | 1 | 60 | 1 | 0 | 1 | 0 | 1 | 1 |
| 0 | 1 | 66 | 2 | 0 | 0 | 0 | 0 | 1 |
| 0 | 1 | 57 | 1 | 0 | 0 | 0 | 0 | 1 |
| 0 | 1 | 71 | 1 | 0 | 0 | 0 | 1 | 1 |

|   |   |    |   |   |   |   |   |   |
|---|---|----|---|---|---|---|---|---|
| 0 | 1 | 56 | 3 | 0 | 1 | 0 | 1 | 1 |
| 0 | 1 | 68 | 3 | 0 | 9 | 0 | 1 | 1 |
| 0 | 2 | 70 | 1 | 0 | 0 | 0 | 1 | 1 |
| 0 | 1 | 62 | 1 | 0 | 0 | 0 | 1 | 1 |
| 0 | 1 | 59 | 1 | 0 | 0 | 0 | 1 | 1 |
| 0 | 1 | 61 | 1 | 0 | 1 | 0 | 1 | 1 |
| 0 | 2 | 63 | 3 | 0 | 1 | 0 | 1 | 1 |
| 0 | 1 | 67 | 1 | 0 | 1 | 0 | 0 | 1 |
| 0 | 1 | 47 | 1 | 0 | 0 | 0 | 1 | 1 |
| 0 | 2 | 73 | 3 | 0 | 1 | 1 | 0 | 1 |
| 0 | 2 | 53 | 2 | 0 | 0 | 1 | 1 | 1 |
| 0 | 2 | 67 | 3 | 0 | 0 | 0 | 1 | 1 |
| 0 | 1 | 55 | 3 | 0 | 0 | 1 | 0 | 1 |
| 0 | 1 | 65 | 1 | 0 | 0 | 0 | 1 | 1 |
| 0 | 1 | 63 | 3 | 0 | 1 | 1 | 0 | 1 |
| 0 | 1 | 67 | 1 | 1 | 1 | 1 | 0 | 1 |
| 0 | 1 | 66 | 3 | 0 | 0 | 0 | 1 | 1 |
| 0 | 1 | 65 | 3 | 0 | 1 | 1 | 1 | 1 |
| 0 | 1 | 68 | 1 | 2 | 0 | 0 | 1 | 1 |
| 0 | 1 | 73 | 2 | 0 | 1 | 0 | 0 | 1 |
| 0 | 1 | 62 | 1 | 0 | 0 | 0 | 1 | 1 |
| 0 | 1 | 65 | 3 | 0 | 1 | 0 | 1 | 1 |
| 0 | 1 | 68 | 1 | 0 | 1 | 0 | 1 | 1 |
| 0 | 1 | 73 | 3 | 9 | 0 | 0 | 1 | 1 |
| 0 | 1 | 61 | 1 | 1 | 0 | 0 | 1 | 1 |
| 0 | 1 | 62 | 2 | 0 | 0 | 0 | 1 | 1 |
| 0 | 1 | 68 | 1 | 0 | 1 | 0 | 1 | 1 |
| 0 | 2 | 73 | 1 | 0 | 0 | 0 | 0 | 0 |
| 0 | 1 | 51 | 1 | 0 | 1 | 0 | 0 | 0 |
| 0 | 1 | 53 | 1 | 1 | 1 | 0 | 0 | 0 |
| 0 | 1 | 67 | 3 | 0 | 0 | 0 | 0 | 0 |
| 0 | 1 | 58 | 1 | 0 | 0 | 0 | 0 | 0 |
| 0 | 1 | 71 | 1 | 0 | 0 | 0 | 0 | 0 |
| 0 | 2 | 70 | 1 | 0 | 1 | 0 | 0 | 1 |
| 0 | 1 | 60 | 1 | 1 | 1 | 0 | 1 | 0 |
| 0 | 1 | 63 | 1 | 0 | 0 | 0 | 0 | 0 |
| 0 | 1 | 65 | 1 | 0 | 1 | 0 | 0 | 0 |
| 0 | 1 | 55 | 3 | 0 | 1 | 0 | 0 | 1 |
| 0 | 1 | 60 | 1 | 1 | 1 | 0 | 0 | 0 |
| 0 | 2 | 73 | 1 | 0 | 0 | 0 | 0 | 0 |
| 0 | 1 | 44 | 3 | 0 | 1 | 0 | 1 | 0 |
| 0 | 1 | 68 | 4 | 0 | 9 | 0 | 0 | 0 |
| 0 | 1 | 58 | 1 | 0 | 0 | 0 | 0 | 0 |
| 0 | 1 | 63 | 1 | 0 | 1 | 0 | 0 | 0 |
| 0 | 1 | 61 | 1 | 1 | 1 | 0 | 0 | 1 |
| 0 | 2 | 57 | 1 | 0 | 0 | 0 | 0 | 0 |
| 0 | 2 | 65 | 1 | 0 | 1 | 0 | 0 | 1 |
| 0 | 1 | 56 | 1 | 0 | 1 | 0 | 0 | 1 |
| 0 | 1 | 74 | 1 | 0 | 0 | 0 | 0 | 0 |
| 0 | 1 | 74 | 3 | 0 | 1 | 0 | 0 | 0 |

|   |   |    |   |   |   |   |   |   |
|---|---|----|---|---|---|---|---|---|
| 0 | 1 | 74 | 1 | 0 | 0 | 0 | 0 | 0 |
| 1 | 1 | 61 | 1 | 0 | 0 | 0 | 0 | 0 |
| 1 | 1 | 64 | 1 | 0 | 0 | 0 | 0 | 0 |
| 1 | 1 | 61 | 1 | 0 | 1 | 0 | 0 | 0 |
| 1 | 1 | 50 | 2 | 0 | 1 | 0 | 0 | 0 |
| 1 | 1 | 61 | 3 | 0 | 0 | 0 | 0 | 0 |
| 1 | 1 | 63 | 3 | 0 | 1 | 0 | 1 | 0 |
| 1 | 1 | 50 | 4 | 1 | 0 | 0 | 0 | 0 |
| 1 | 1 | 63 | 1 | 0 | 0 | 0 | 0 | 0 |
| 1 | 1 | 65 | 3 | 0 | 1 | 0 | 0 | 0 |
| 1 | 1 | 41 | 3 | 0 | 0 | 0 | 0 | 0 |
| 1 | 1 | 50 | 2 | 2 | 0 | 0 | 0 | 0 |
| 1 | 1 | 53 | 3 | 0 | 0 | 0 | 0 | 0 |
| 1 | 1 | 45 | 2 | 2 | 0 | 0 | 0 | 0 |
| 1 | 1 | 41 | 3 | 0 | 0 | 0 | 0 | 0 |
| 1 | 1 | 66 | 2 | 2 | 1 | 0 | 0 | 1 |
| 1 | 1 | 65 | 1 | 1 | 1 | 0 | 1 | 1 |
| 1 | 2 | 54 | 2 | 0 | 0 | 0 | 1 | 1 |
| 1 | 1 | 49 | 3 | 0 | 1 | 0 | 1 | 1 |
| 1 | 1 | 62 | 3 | 0 | 0 | 0 | 1 | 1 |
| 1 | 2 | 63 | 1 | 0 | 0 | 0 | 1 | 1 |
| 1 | 1 | 59 | 1 | 1 | 1 | 0 | 1 | 1 |
| 1 | 2 | 67 | 2 | 0 | 1 | 0 | 0 | 1 |
| 1 | 1 | 66 | 1 | 0 | 0 | 0 | 0 | 1 |
| 1 | 1 | 65 | 1 | 0 | 0 | 0 | 1 | 1 |
| 1 | 1 | 65 | 1 | 0 | 0 | 0 | 0 | 1 |
| 1 | 1 | 66 | 1 | 0 | 1 | 1 | 1 | 1 |
| 1 | 1 | 68 | 3 | 0 | 0 | 0 | 1 | 1 |
| 1 | 1 | 66 | 3 | 0 | 0 | 0 | 1 | 1 |
| 1 | 1 | 59 | 2 | 0 | 0 | 0 | 0 | 1 |
| 1 | 1 | 47 | 1 | 1 | 0 | 0 | 0 | 1 |
| 1 | 1 | 47 | 3 | 0 | 1 | 0 | 1 | 0 |
| 1 | 1 | 55 | 3 | 0 | 0 | 0 | 0 | 0 |
| 1 | 1 | 51 | 1 | 0 | 0 | 0 | 0 | 0 |
| 1 | 1 | 70 | 1 | 0 | 0 | 0 | 0 | 0 |
| 1 | 1 | 58 | 1 | 0 | 0 | 0 | 0 | 0 |
| 1 | 1 | 57 | 1 | 0 | 0 | 0 | 0 | 0 |
| 1 | 2 | 66 | 1 | 0 | 1 | 0 | 0 | 0 |
| 1 | 2 | 65 | 3 | 0 | 1 | 0 | 0 | 1 |
| 1 | 1 | 62 | 3 | 0 | 0 | 0 | 0 | 0 |
| 1 | 1 | 67 | 3 | 0 | 1 | 1 | 1 | 0 |
| 1 | 1 | 45 | 2 | 0 | 0 | 0 | 0 | 0 |
| 1 | 1 | 64 | 3 | 0 | 0 | 0 | 0 | 0 |
| 1 | 2 | 55 | 4 | 0 | 1 | 0 | 0 | 1 |
| 1 | 2 | 64 | 3 | 0 | 0 | 0 | 0 | 0 |
| 1 | 2 | 72 | 3 | 0 | 0 | 0 | 0 | 0 |
| 1 | 1 | 68 | 3 | 0 | 0 | 0 | 0 | 0 |
| 1 | 1 | 59 | 1 | 1 | 0 | 0 | 0 | 0 |
| 1 | 1 | 72 | 1 | 0 | 0 | 0 | 1 | 0 |
| 1 | 1 | 54 | 3 | 0 | 1 | 0 | 0 | 1 |

|   |   |    |   |   |   |   |   |   |
|---|---|----|---|---|---|---|---|---|
| 1 | 1 | 56 | 3 | 0 | 0 | 0 | 1 | 1 |
| 1 | 1 | 63 | 1 | 0 | 1 | 0 | 1 | 1 |
| 1 | 1 | 57 | 4 | 0 | 0 | 0 | 1 | 1 |
| 1 | 1 | 66 | 1 | 1 | 0 | 0 | 1 | 1 |
| 1 | 1 | 59 | 1 | 1 | 1 | 0 | 1 | 1 |
| 1 | 1 | 62 | 1 | 0 | 0 | 0 | 1 | 1 |
| 1 | 1 | 54 | 2 | 2 | 0 | 0 | 1 | 1 |
| 1 | 1 | 63 | 1 | 0 | 1 | 1 | 0 | 1 |
| 1 | 1 | 61 | 3 | 0 | 0 | 0 | 1 | 1 |
| 1 | 1 | 56 | 1 | 0 | 1 | 0 | 1 | 1 |
| 1 | 1 | 75 | 1 | 0 | 1 | 0 | 1 | 1 |
| 1 | 2 | 65 | 1 | 0 | 1 | 0 | 0 | 1 |
| 1 | 1 | 63 | 1 | 1 | 1 | 0 | 1 | 1 |
| 1 | 2 | 53 | 3 | 0 | 1 | 0 | 1 | 1 |
| 1 | 1 | 50 | 3 | 0 | 0 | 0 | 1 | 1 |
| 1 | 1 | 67 | 1 | 0 | 1 | 0 | 1 | 1 |
| 1 | 1 | 46 | 1 | 0 | 1 | 0 | 1 | 1 |
| 1 | 2 | 72 | 3 | 0 | 1 | 0 | 1 | 1 |
| 1 | 1 | 71 | 1 | 0 | 0 | 0 | 0 | 0 |
| 1 | 1 | 74 | 2 | 0 | 1 | 0 | 0 | 0 |
| 1 | 1 | 57 | 1 | 1 | 0 | 0 | 0 | 0 |
| 1 | 1 | 64 | 3 | 0 | 0 | 0 | 0 | 0 |
| 1 | 1 | 60 | 1 | 1 | 0 | 0 | 0 | 1 |
| 1 | 1 | 53 | 2 | 2 | 0 | 0 | 0 | 0 |
| 1 | 1 | 44 | 3 | 0 | 1 | 0 | 0 | 0 |
| 1 | 1 | 65 | 3 | 0 | 0 | 0 | 0 | 0 |
| 1 | 1 | 74 | 1 | 0 | 0 | 0 | 0 | 0 |
| 1 | 1 | 69 | 3 | 0 | 0 | 0 | 0 | 0 |
| 1 | 1 | 28 | 4 | 9 | 0 | 0 | 0 | 0 |
| 1 | 1 | 70 | 1 | 0 | 0 | 0 | 0 | 0 |
| 1 | 1 | 70 | 1 | 1 | 0 | 0 | 0 | 0 |
| 1 | 1 | 65 | 2 | 2 | 1 | 0 | 0 | 1 |
| 1 | 2 | 68 | 3 | 0 | 0 | 0 | 0 | 0 |
| 1 | 1 | 52 | 3 | 0 | 1 | 0 | 1 | 0 |
| 1 | 1 | 60 | 2 | 2 | 0 | 0 | 0 | 0 |
| 1 | 1 | 63 | 1 | 0 | 0 | 0 | 0 | 0 |
| 1 | 1 | 69 | 1 | 1 | 0 | 0 | 0 | 0 |
| 1 | 1 | 70 | 1 | 0 | 0 | 0 | 0 | 0 |
| 1 | 1 | 62 | 3 | 0 | 1 | 0 | 1 | 1 |
| 1 | 1 | 67 | 1 | 0 | 0 | 0 | 1 | 1 |
| 1 | 1 | 71 | 3 | 0 | 1 | 1 | 1 | 1 |
| 1 | 1 | 49 | 4 | 0 | 0 | 0 | 0 | 1 |
| 1 | 1 | 60 | 1 | 1 | 0 | 0 | 1 | 1 |
| 1 | 2 | 57 | 1 | 0 | 0 | 0 | 1 | 1 |
| 1 | 1 | 65 | 3 | 0 | 0 | 0 | 1 | 1 |
| 1 | 2 | 68 | 1 | 0 | 1 | 0 | 1 | 1 |
| 1 | 1 | 64 | 1 | 1 | 0 | 0 | 1 | 1 |
| 1 | 2 | 68 | 1 | 0 | 0 | 0 | 1 | 1 |
| 1 | 1 | 62 | 1 | 0 | 0 | 0 | 1 | 1 |
| 1 | 1 | 62 | 3 | 0 | 1 | 0 | 0 | 1 |

|   |   |    |   |   |   |   |   |   |
|---|---|----|---|---|---|---|---|---|
| 1 | 1 | 65 | 4 | 0 | 0 | 0 | 1 | 1 |
| 1 | 2 | 56 | 2 | 0 | 0 | 0 | 0 | 1 |
| 1 | 1 | 67 | 2 | 2 | 1 | 0 | 0 | 1 |
| 1 | 1 | 59 | 3 | 0 | 0 | 0 | 0 | 1 |
| 1 | 1 | 63 | 2 | 2 | 1 | 0 | 1 | 1 |
| 1 | 1 | 56 | 3 | 0 | 0 | 0 | 0 | 1 |
| 1 | 1 | 70 | 3 | 0 | 1 | 0 | 1 | 1 |
| 1 | 2 | 65 | 3 | 0 | 0 | 0 | 0 | 1 |
| 1 | 1 | 68 | 1 | 0 | 0 | 0 | 1 | 1 |
| 1 | 1 | 63 | 1 | 1 | 0 | 0 | 1 | 1 |
| 1 | 2 | 67 | 2 | 0 | 0 | 0 | 1 | 1 |
| 1 | 1 | 45 | 3 | 0 | 1 | 0 | 0 | 1 |
| 1 | 1 | 67 | 1 | 2 | 0 | 0 | 0 | 1 |
| 1 | 1 | 65 | 1 | 0 | 0 | 0 | 0 | 0 |
| 1 | 1 | 65 | 2 | 0 | 0 | 0 | 0 | 0 |
| 1 | 1 | 59 | 1 | 2 | 0 | 0 | 0 | 0 |
| 1 | 1 | 62 | 1 | 2 | 0 | 1 | 0 | 0 |
| 1 | 1 | 61 | 1 | 0 | 1 | 0 | 1 | 0 |
| 1 | 1 | 56 | 3 | 0 | 0 | 0 | 0 | 0 |
| 1 | 1 | 58 | 1 | 0 | 0 | 0 | 0 | 0 |
| 1 | 1 | 49 | 3 | 0 | 0 | 0 | 0 | 0 |
| 1 | 1 | 60 | 1 | 0 | 1 | 0 | 1 | 0 |
| 1 | 2 | 68 | 1 | 0 | 1 | 0 | 1 | 0 |
| 1 | 1 | 50 | 1 | 0 | 0 | 0 | 0 | 0 |
| 1 | 1 | 63 | 1 | 1 | 1 | 0 | 0 | 0 |
| 1 | 1 | 63 | 1 | 1 | 1 | 0 | 1 | 0 |
| 1 | 1 | 68 | 3 | 0 | 1 | 0 | 1 | 1 |
| 1 | 1 | 73 | 1 | 0 | 0 | 0 | 0 | 0 |
| 1 | 1 | 56 | 3 | 0 | 0 | 0 | 0 | 1 |
| 1 | 2 | 62 | 4 | 0 | 1 | 0 | 0 | 1 |
| 1 | 1 | 52 | 1 | 1 | 0 | 0 | 0 | 0 |
| 1 | 1 | 66 | 1 | 0 | 0 | 0 | 0 | 0 |
| 1 | 1 | 65 | 3 | 0 | 0 | 0 | 0 | 0 |
| 1 | 1 | 67 | 3 | 0 | 0 | 0 | 0 | 0 |
| 1 | 1 | 50 | 3 | 0 | 0 | 0 | 0 | 0 |
| 1 | 1 | 61 | 1 | 1 | 0 | 0 | 0 | 0 |
| 1 | 1 | 67 | 3 | 0 | 0 | 0 | 0 | 0 |
| 1 | 1 | 65 | 3 | 0 | 0 | 0 | 0 | 0 |
| 1 | 1 | 72 | 1 | 0 | 1 | 0 | 0 | 0 |
| 1 | 1 | 52 | 4 | 1 | 0 | 0 | 1 | 1 |
| 1 | 1 | 69 | 4 | 2 | 1 | 0 | 1 | 1 |
| 1 | 1 | 64 | 1 | 1 | 1 | 0 |   |   |
| 1 | 1 | 58 | 3 | 0 | 0 | 0 | 1 | 1 |
| 1 | 2 | 70 | 1 | 0 | 0 | 0 | 1 | 1 |
| 1 | 2 | 71 | 1 | 0 | 0 | 0 | 1 | 1 |
| 1 | 1 | 39 | 2 | 2 | 0 | 0 | 0 | 1 |
| 1 | 1 | 60 | 2 | 1 | 0 | 0 | 0 | 0 |
| 1 | 1 | 66 | 2 | 0 | 0 | 0 | 0 | 0 |
| 1 | 1 | 57 | 1 | 0 | 1 | 1 | 0 | 1 |
| 1 | 1 | 71 | 1 | 0 | 1 | 0 | 0 | 0 |

|   |   |    |   |   |   |   |   |   |
|---|---|----|---|---|---|---|---|---|
| 1 | 1 | 56 | 3 | 0 | 1 | 0 | 0 | 0 |
| 1 | 1 | 68 | 1 | 0 | 1 | 0 | 0 | 0 |
| 1 | 2 | 70 | 3 | 0 | 1 | 0 | 0 | 1 |
| 1 | 1 | 62 | 2 | 2 | 0 | 0 | 1 | 1 |
| 1 | 1 | 59 | 3 | 0 | 0 | 0 | 1 | 1 |
| 1 | 1 | 62 | 1 | 0 | 0 | 0 | 1 | 1 |
| 1 | 2 | 63 | 1 | 0 | 1 | 0 | 1 | 9 |
| 1 | 1 | 67 | 3 | 0 | 1 | 0 | 1 | 1 |
| 1 | 1 | 48 | 2 | 2 | 0 | 0 | 1 | 1 |
| 1 | 2 | 73 | 3 | 0 | 1 | 1 | 1 | 1 |
| 1 | 2 | 54 | 1 | 0 | 1 | 0 | 0 | 1 |
| 1 | 2 | 68 | 2 | 0 | 0 | 0 | 1 | 1 |
| 1 | 1 | 56 | 3 | 0 | 0 | 0 | 1 | 1 |
| 1 | 1 | 66 | 1 | 0 | 0 | 0 | 0 | 1 |
| 1 | 1 | 68 | 2 | 2 | 0 | 0 | 0 | 1 |
| 1 | 1 | 68 | 2 | 0 | 0 | 0 | 1 | 1 |
| 1 | 1 | 67 | 3 | 0 | 0 | 0 | 1 | 1 |
| 1 | 1 | 66 | 1 | 0 | 1 | 1 | 1 | 1 |
| 1 | 1 | 68 | 2 | 2 |   |   | 0 | 1 |
| 1 | 1 | 73 | 1 | 0 | 0 | 0 | 1 | 1 |
| 1 | 1 | 62 | 2 | 2 | 1 | 0 | 0 | 1 |
| 1 | 1 | 65 | 2 | 1 | 0 | 0 | 1 | 1 |
| 1 | 1 | 68 | 1 | 0 | 1 | 0 | 1 | 1 |
| 1 | 1 | 73 | 1 | 0 | 0 | 0 | 0 | 0 |
| 1 | 1 | 61 | 1 | 1 | 0 | 0 | 0 | 0 |
| 1 | 1 | 63 | 3 | 0 | 0 | 0 | 0 | 0 |
| 1 | 1 | 69 | 3 | 0 | 0 | 0 | 0 | 0 |
| 1 | 2 | 74 | 1 | 0 | 1 | 0 | 0 | 0 |
| 1 | 1 | 51 | 3 | 0 | 1 | 0 | 0 | 0 |
| 1 | 1 | 55 | 3 | 0 | 0 | 0 | 0 | 1 |
| 1 | 1 | 67 | 3 | 0 | 0 | 0 | 0 | 0 |
| 1 | 1 | 58 | 2 | 2 | 1 | 0 | 0 | 0 |
| 1 | 1 | 71 | 3 | 0 | 1 | 0 | 0 | 0 |
| 1 | 2 | 70 | 3 | 0 | 0 | 0 | 0 | 0 |
| 1 | 1 | 60 | 2 | 0 | 0 | 0 | 0 | 0 |
| 1 | 1 | 63 | 2 | 0 | 0 | 0 | 0 | 0 |
| 1 | 1 | 65 | 1 | 0 | 0 | 0 | 0 | 0 |
| 1 | 1 | 55 | 2 | 2 | 0 | 0 | 0 | 0 |
| 1 | 1 | 60 | 2 | 0 | 0 | 0 | 0 | 0 |
| 1 | 2 | 73 | 2 | 2 | 0 | 0 | 0 | 0 |
| 1 | 1 | 44 | 3 | 0 | 1 | 0 | 0 | 0 |
| 1 | 1 | 68 | 3 | 0 | 0 | 0 | 0 | 0 |
| 1 | 1 | 58 | 3 | 0 | 0 | 0 | 0 | 0 |
| 1 | 1 | 63 | 1 | 0 | 1 | 0 | 0 | 1 |
| 1 | 1 | 61 | 2 | 2 | 1 | 1 | 1 | 1 |
| 1 | 2 | 57 | 2 | 2 | 0 | 0 | 1 | 1 |
| 1 | 2 | 65 | 1 | 0 | 1 | 0 | 1 | 1 |
| 1 | 1 | 56 | 1 | 0 | 0 | 0 | 0 | 0 |
| 1 | 1 | 74 | 1 | 0 | 0 | 0 | 0 | 0 |
| 1 | 1 | 74 | 1 | 1 | 1 | 1 | 0 | 0 |



1 1 74 3 0 0 0 0 0

| Beta block | Statins | Plaque | BOP | PPD 4-5 | r PPD ≥ 6 | n Total PPD | MMP-8   | MMP-9  |
|------------|---------|--------|-----|---------|-----------|-------------|---------|--------|
| 1          | 1       | 54     | 45  | 19      | 3         | 108         | 530,55  | 330,53 |
| 1          | 1       | 48     | 47  | 14      | 0         | 57          | 506,5   | 330    |
| 1          | 1       | 49     | 22  | 12      | 1         | 42          | 435,91  | 207,38 |
| 1          | 1       | 103    | 71  | 2       | 0         | 8           | 99,06   | 26,37  |
| 1          | 1       | 123    | 76  | 20      | 0         | 53          | 740,8   | 380,94 |
| 1          | 1       | 81     | 68  | 20      | 0         | 84          | 662,38  | 114,58 |
| 1          | 1       | 76     | 58  | 18      | 2         | 89          | 418,05  | 251,16 |
| 1          | 1       | 46     | 6   | 4       | 0         | 8           | 106,34  | 221,7  |
| 1          | 1       | 113    | 45  | 7       | 0         | 20          | 727,44  | 68,18  |
| 1          | 1       | 108    | 92  | 19      | 0         | 79          | 433,93  | 474,88 |
| 1          | 1       | 67     | 75  | 40      | 11        | 243         | 396,2   | 629,54 |
| 1          | 1       | 85     | 10  | 0       | 0         | 0           | 387,65  | 44,13  |
| 1          | 1       | 65     | 28  | 24      | 10        | 162         | 708,5   | 520,13 |
| 1          | 1       | 104    | 58  | 40      | 5         | 202         | 88,17   | 139,79 |
| 1          | 1       | 112    | 0   | 0       | 0         | 0           | 193,65  | 284,13 |
| 1          | 1       | 96     | 50  | 6       | 1         | 30          | 438,69  | 190,77 |
| 1          | 1       | 24     | 23  | 2       | 0         | 8           | 140,92  | 9,36   |
| 1          | 1       | 117    | 25  | 0       | 0         | 1           | 294,27  | 128,9  |
| 1          | 1       | 83     | 80  | 8       | 0         | 20          | 243,99  | 61,95  |
| 1          | 1       | 25     | 20  | 5       | 1         | 26          | 303,51  | 314,49 |
| 1          | 0       | 68     | 68  | 10      | 1         | 47          | 690,69  | 320,22 |
| 1          | 1       | 53     | 80  | 6       | 0         | 25          | 169,73  | 57,87  |
| 1          | 1       | 42     | 8   | 3       | 0         | 4           | 551,96  | 272,68 |
| 1          | 1       | 33     | 12  | 4       | 0         | 13          | 40,99   | 101,98 |
| 1          | 1       | 75     | 87  | 23      | 0         | 83          | 830     | 296,74 |
| 1          | 1       | 65     | 62  | 10      | 0         | 42          | 365,73  | 131,77 |
| 1          | 1       | 54     | 15  | 41      | 2         | 196         | 871,15  | 280,7  |
| 1          | 1       | 48     | 44  | 5       | 43        | 440         | 724,8   | 612,93 |
| 1          | 1       | 64     | 7   | 5       | 0         | 16          | 55,7    | 3,46   |
| 1          | 1       | 104    | 104 | 56      | 26        | 349         | 623,79  | 111,72 |
| 1          | 1       | 88     | 68  | 0       | 0         | 0           | 902,15  | 317,36 |
| 1          | 1       | 16     | 2   | 0       | 0         | 0           | 469,24  | 204,51 |
| 1          | 1       | 78     | 8   | 16      | 0         | 59          | 416,53  | 186,76 |
| 1          | 1       | 14     | 1   | 0       | 0         | 0           | 208,84  | 110    |
| 1          | 1       | 86     | 59  | 59      | 0         | 225         | 739,45  | 130,14 |
| 1          | 1       | 64     | 57  | 42      | 0         | 170         | 1049,65 | 369,42 |
| 1          | 1       | 28     | 2   | 0       | 0         | 1           | 202,85  | 67,61  |
| 1          | 1       | 0      | 1   | 0       | 0         | 0           | 61,28   | 110,57 |
| 1          | 0       | 87     | 75  | 7       | 0         | 32          | 308,52  | 257,21 |
| 0          | 0       | 75     | 24  | 17      | 1         | 95          | 499,63  | 150,1  |
| 0          | 0       | 84     | 13  | 6       | 1         | 35          | 193,83  | 77,92  |
| 0          | 0       | 50     | 55  | 27      | 6         | 158         | 186,23  | 222,27 |
| 0          | 0       | 20     | 20  | 9       | 6         | 65          | 284,27  | 239,45 |
| 1          | 1       | 16     | 16  | 1       | 0         | 4           | 159,98  | 5,17   |
| 0          | 0       | 84     | 38  | 2       | 0         | 10          | 27,47   | 58,55  |
| 0          | 1       | 76     | 3   | 0       | 0         | 0           | 19      | 0      |
| 0          | 1       | 119    | 21  | 0       | 0         | 0           | 83,64   | 233,05 |
| 0          | 0       | 75     | 8   | 0       | 0         | 4           | 76,33   | 118,25 |
| 1          | 0       | 18     | 9   | 3       | 0         | 4           | 342,54  | 213,15 |

|   |   |     |    |    |    |     |         |         |
|---|---|-----|----|----|----|-----|---------|---------|
| 0 | 0 | 76  | 65 | 47 | 7  | 244 | 187,42  | 8,03    |
| 0 | 0 | 88  | 76 | 2  | 0  | 9   | 152,87  | 584,36  |
| 0 | 0 | 68  | 34 | 12 | 1  | 50  | 206,76  | 59,31   |
| 0 | 1 | 112 | 51 | 33 | 3  | 149 | 324,64  | 51,66   |
| 1 | 1 | 85  | 80 | 18 | 0  | 65  | 250,05  | 686,92  |
| 0 | 0 | 95  | 61 | 18 | 1  | 74  | 1186,49 | 90,69   |
| 0 | 0 | 77  | 84 | 0  | 0  | 0   | 136,07  | 305,76  |
| 0 | 0 | 66  | 82 | 16 | 0  | 60  | 610,32  | 481,03  |
| 0 | 0 | 57  | 76 | 5  | 2  | 34  | 274,11  | 86,1    |
| 0 | 0 | 49  | 34 | 2  | 0  | 8   | 1531,62 | 1338,25 |
| 0 | 1 | 54  | 7  | 7  | 0  | 28  | 299,94  | 226,16  |
| 0 | 0 | 0   | 0  | 0  | 0  | 0   | 4,22    | 0       |
| 0 | 0 | 15  | 2  | 0  | 0  | 0   | 18,47   | 26,4    |
| 0 | 0 | 21  | 8  | 46 | 1  | 189 | 30,33   | 0       |
| 0 | 0 | 44  | 0  | 0  | 0  | 0   | 208,46  | 82,28   |
| 0 | 1 | 78  | 31 | 20 | 12 | 0   | 102,26  | 314,18  |
| 1 | 1 | 80  | 76 | 3  | 0  | 8   | 462,04  | 612,68  |
| 0 | 0 | 41  | 5  | 17 | 1  | 0   | 225,83  | 295,81  |
| 0 | 0 | 94  | 4  | 0  | 0  | 0   | 444,72  | 98,35   |
| 0 | 0 | 88  | 1  | 1  | 0  | 0   | 155,11  | 8,03    |
| 0 | 0 | 56  | 27 | 1  | 0  | 4   | 649,26  | 87,63   |
| 0 | 0 | 101 | 51 | 19 | 2  | 84  | 1148,29 | 404,5   |
| 1 | 1 | 59  | 66 | 15 | 2  | 63  | 764,76  | 677,73  |
| 0 | 1 | 60  | 24 | 6  | 2  | 37  | 309,65  | 163,4   |
| 0 | 0 | 45  | 70 | 3  | 0  | 12  | 393,69  | 317,24  |
| 0 | 0 | 35  | 35 | 22 | 5  | 128 | 526,7   | 350,15  |
| 0 | 0 | 23  | 15 | 10 | 1  | 48  | 27,46   | 55,49   |
| 1 | 1 | 42  | 72 | 18 | 3  | 103 | 335,14  | 803,25  |
| 1 | 1 | 76  | 67 | 14 | 1  | 52  | 575,81  | 344,8   |
| 1 | 1 | 88  | 52 | 16 | 3  | 88  | 512,99  | 907,34  |
| 1 | 1 | 21  | 12 | 5  | 0  | 23  | 494,21  | 146,57  |
| 1 | 1 | 32  | 48 | 17 | 9  | 103 | 288,96  | 264,43  |
| 1 | 1 | 80  | 53 | 14 | 2  | 65  | 983,86  | 216,22  |
| 1 | 1 | 39  | 29 | 0  | 0  | 0   | 72,54   | 84,57   |
| 1 | 1 | 9   | 21 | 3  | 0  | 4   | 16,01   | 1,15    |
| 1 | 1 | 88  | 62 | 20 | 11 | 130 | 29,32   | 661,16  |
| 1 | 0 | 68  | 57 | 6  | 1  | 35  | 47,74   | 131,96  |
| 1 | 1 | 88  | 52 | 12 | 1  | 41  | 562,35  | 176,26  |
| 1 | 1 | 77  | 74 | 39 | 13 | 252 | 320,24  | 104,17  |
| 1 | 1 | 42  | 20 | 7  | 1  | 34  | 153,99  | 325,49  |
| 1 | 1 | 3   | 44 | 28 | 11 | 192 | 155,39  | 399,82  |
| 0 | 0 | 102 | 51 | 7  | 0  | 13  | 174,42  | 35,99   |
| 1 | 1 | 77  | 23 | 13 | 0  | 56  | 147,27  | 188,84  |
| 1 | 1 | 73  | 46 | 6  | 0  | 25  | 18,02   | 138,54  |
| 1 | 1 | 100 | 99 | 17 | 3  | 92  | 931,27  | 145,07  |
| 1 | 1 | 61  | 43 | 6  | 0  | 25  | 80,8    | 264,61  |
| 1 | 1 | 73  | 81 | 21 | 1  | 98  | 1110,25 | 261,34  |
| 1 | 1 | 18  | 6  | 5  | 0  | 21  | 24,57   | 0       |
| 1 | 1 | 80  | 28 | 7  | 6  | 38  | 196,67  | 138,54  |
| 1 | 1 | 119 | 74 | 16 | 0  | 50  | 14,8    | 24,88   |

|   |   |    |    |    |    |     |         |         |
|---|---|----|----|----|----|-----|---------|---------|
| 1 | 1 | 60 | 53 | 11 | 2  | 61  | 1081,56 | 605,59  |
| 1 | 1 | 61 | 43 | 7  | 2  | 43  | 292,13  | 106,53  |
| 1 | 1 | 65 | 22 | 23 | 0  | 85  | 148,42  | 137,89  |
| 1 | 1 | 72 | 67 | 3  | 3  | 32  | 167,58  | 144,42  |
| 0 | 1 | 84 | 22 | 11 | 4  | 68  | 773,86  | 34,03   |
| 1 | 0 | 72 | 41 | 33 | 5  | 182 | 115,1   | 164,02  |
| 1 | 1 | 74 | 64 | 6  | 4  | 42  | 725,46  | 287,47  |
| 1 | 1 | 58 | 90 | 21 | 1  | 81  | 239,59  | 582,27  |
| 0 | 0 | 19 | 6  | 10 | 1  | 40  | 1089,15 | 783,26  |
| 1 | 0 | 27 | 15 | 13 | 2  | 71  | 179,41  | 46,44   |
| 0 | 0 | 4  | 11 | 22 | 5  | 128 | 1079,71 | 828,98  |
| 1 | 1 | 60 | 34 | 9  | 0  | 37  | 114,68  | 5,94    |
| 0 | 0 | 50 | 19 | 20 | 1  | 88  | 528,62  | 545,49  |
| 0 | 1 | 57 | 47 | 33 | 7  | 186 | 1242,76 | 1330    |
| 0 | 0 | 60 | 2  | 4  | 0  | 17  | 84,33   | 3,33    |
| 0 | 0 | 59 | 12 | 9  | 1  | 43  | 630,64  | 544,18  |
| 0 | 0 | 32 | 19 | 19 | 1  | 93  | 87,49   | 233,91  |
| 1 | 0 | 67 | 18 | 11 | 1  | 38  | 746,21  | 585,34  |
| 0 | 0 | 14 | 9  | 0  | 1  | 6   | 105,28  | 334,5   |
| 0 | 0 | 43 | 28 | 29 | 0  | 117 | 32,91   | 235,87  |
| 0 | 0 | 55 | 35 | 27 | 4  | 125 | 3,07    | 0       |
| 0 | 0 | 74 | 32 | 39 | 7  | 192 | 476,12  | 107,19  |
| 0 | 0 | 57 | 10 | 20 | 2  | 99  | 43,37   | 293,35  |
| 1 | 0 | 34 | 21 | 9  | 3  | 66  | 615,9   | 383,49  |
| 0 | 0 | 67 | 18 | 37 | 34 | 357 | 772,45  | 188,84  |
| 1 | 0 | 21 | 22 | 0  | 0  | 44  | 379,97  | 121,56  |
| 0 | 0 | 56 | 37 | 9  | 2  | 48  | 948,06  | 103,27  |
| 0 | 0 | 11 | 35 | 6  | 3  | 5   | 1192,6  | 1721,27 |
| 1 | 0 | 10 | 6  | 1  | 0  | 0   | 1086,27 | 410,93  |
| 0 | 0 | 2  | 1  | 0  | 0  | 0   | 230,82  | 148,99  |
| 0 | 1 | 9  | 19 | 0  | 0  | 0   | 763,37  | 231,33  |
| 0 | 0 | 24 | 18 | 0  | 0  | 82  | 1190,98 | 469,84  |
| 0 | 0 | 54 | 38 | 12 | 2  | 0   | 1108,78 | 475,33  |
| 0 | 0 | 45 | 38 | 0  | 0  | 0   | 291,07  | 168,78  |
| 0 | 1 | 24 | 21 | 0  | 0  | 0   | 625,49  | 119,98  |
| 0 | 1 | 45 | 48 | 0  | 0  | 0   | 1211,54 | 85,61   |
| 0 | 0 | 29 | 17 | 0  | 0  | 0   | 818,75  | 139,91  |
| 0 | 1 | 7  | 14 | 0  | 0  | 0   | 720,2   | 274,63  |
| 0 | 0 | 6  | 2  | 0  | 0  | 0   | 240,9   | 51,25   |
| 1 | 1 | 8  | 32 | 0  | 0  | 0   | 1227,4  | 388,73  |
| 0 | 1 | 52 | 48 | 0  | 0  | 0   | 1126,41 | 32,69   |
| 1 | 1 | 30 | 26 | 0  | 0  | 0   | 1027,35 | 188,03  |
| 1 | 1 | 47 | 39 | 0  | 0  | 0   | 1336,11 | 119,29  |
| 1 | 1 | 3  | 2  | 0  | 0  | 0   | 235,48  | 317,93  |
| 1 | 0 | 19 | 3  | 1  | 0  | 130 | 276,62  | 401,1   |
| 1 | 0 | 51 | 74 | 41 | 0  | 179 | 642,21  | 559,88  |
| 1 | 1 | 25 | 30 | 38 | 3  | 120 | 251,65  | 129,6   |
| 1 | 0 | 55 | 51 | 17 | 8  | 123 | 844,82  | 390,1   |
| 1 | 1 | 65 | 28 | 36 | 1  | 12  | 635,24  | 525,51  |
| 1 | 1 | 8  | 12 | 3  | 0  | 125 | 90,82   | 178,4   |

|   |   |     |    |    |    |     |         |        |
|---|---|-----|----|----|----|-----|---------|--------|
| 1 | 1 | 63  | 20 | 43 | 0  | 85  | 777,38  | 367,42 |
| 1 | 1 | 29  | 21 | 25 | 0  | 49  | 542,75  | 852    |
| 1 | 1 | 11  | 2  | 12 | 0  | 102 | 298,85  | 104,17 |
| 1 | 1 | 26  | 21 | 22 | 1  | 294 | 252,8   | 644,42 |
| 1 | 1 | 33  | 23 | 33 | 0  | 41  | 613,66  | 199,02 |
| 1 | 1 | 15  | 9  | 11 | 0  | 29  | 547,21  | 150,22 |
| 1 | 1 | 17  | 21 | 7  | 0  | 32  | 182,21  | 294,56 |
| 1 | 1 | 24  | 14 | 8  | 0  | 343 | 142,14  | 49,18  |
| 1 | 1 | 78  | 70 | 72 | 3  | 79  | 969,44  | 270,51 |
| 1 | 1 | 34  | 35 | 19 | 0  | 191 | 801,07  | 465,71 |
| 1 | 1 | 37  | 47 | 38 | 9  | 33  | 35,55   | 144,04 |
| 1 | 1 | 30  | 16 | 8  | 0  | 106 | 780,93  | 520,7  |
| 1 | 1 | 63  | 43 | 29 | 0  | 60  | 237,85  | 27,19  |
| 1 | 1 | 30  | 26 | 19 | 0  | 126 | 161,08  | 168,09 |
| 1 | 0 | 41  | 26 | 34 | 1  | 188 | 14,46   | 158,47 |
| 1 | 1 | 63  | 96 | 32 | 13 | 43  | 1025,94 | 897,36 |
| 1 | 1 | 23  | 15 | 9  | 1  | 95  | 228,1   | 267,76 |
| 1 | 1 | 19  | 21 | 21 | 1  | 0   | 430,39  | 236,14 |
| 0 | 1 | 0   | 0  | 0  | 0  | 195 | 53,42   | 294,56 |
| 1 | 1 | 42  | 9  | 46 | 0  | 85  | 866,15  | 136,48 |
| 1 | 1 | 42  | 44 | 13 | 0  | 10  | 662,38  | 63,98  |
| 1 | 1 | 32  | 9  | 2  | 0  | 42  | 28,07   | 172,01 |
| 1 | 1 | 33  | 0  | 10 | 0  | 64  | 6,45    | 0,26   |
| 1 | 1 | 35  | 24 | 16 | 0  | 61  | 19,78   | 82,19  |
| 1 | 1 | 0   | 7  | 19 | 0  | 120 | 10,54   | 86,44  |
| 1 | 1 | 11  | 5  | 22 | 4  | 0   | 954,32  | 630,82 |
| 1 | 1 | 0   | 0  | 0  | 0  | 0   | 64,57   | 0      |
| 0 | 0 | 50  | 22 | 20 | 2  | 87  | 1327,37 | 852,94 |
| 0 | 1 | 46  | 13 | 23 | 1  | 97  | 56,51   | 40,32  |
| 0 | 0 | 70  | 31 | 29 | 0  | 48  | 1218,53 | 247,27 |
| 0 | 0 | 22  | 26 | 22 | 0  | 101 | 283,75  | 286,11 |
| 0 | 0 | 47  | 21 | 21 | 2  | 0   | 675,77  | 297,64 |
| 0 | 0 | 0   | 0  | 0  | 0  | 96  | 266,73  | 186,58 |
| 0 | 1 | 93  | 22 | 23 | 1  | 98  | 19,52   | 0      |
| 0 | 0 | 93  | 29 | 20 | 2  | 105 | 1223,56 | 335,87 |
| 0 | 0 | 112 | 27 | 26 | 0  | 91  | 49,15   | 0      |
| 1 | 0 | 32  | 31 | 22 | 0  | 70  | 128,55  | 91,9   |
| 1 | 1 | 30  | 17 | 20 | 0  | 212 | 28,81   | 36,07  |
| 1 | 1 | 77  | 30 | 31 | 12 | 64  | 1375,88 | 736,42 |
| 0 | 0 | 16  | 16 | 16 | 0  | 60  | 69,51   | 67,02  |
| 1 | 1 | 90  | 11 | 22 | 0  | 68  | 257,44  | 351,65 |
| 0 | 0 | 83  | 18 | 17 | 0  | 169 | 45,08   | 253,33 |
| 0 | 0 | 76  | 41 | 42 | 0  | 42  | 729,43  | 267,9  |
| 0 | 0 | 35  | 5  | 10 | 0  | 118 | 39,82   | 37,28  |
| 1 | 1 | 46  | 32 | 33 | 0  | 84  | 492,86  | 255,76 |
| 0 | 0 | 67  | 23 | 22 | 0  | 57  | 725,46  | 470,6  |
| 0 | 1 | 40  | 22 | 9  | 3  | 77  | 116,57  | 80,37  |
| 0 | 1 | 10  | 4  | 16 | 0  | 40  | 63,18   | 23,32  |
| 0 | 0 | 11  | 9  | 10 | 0  | 26  | 79,34   | 82,19  |
| 0 | 0 | 12  | 14 | 6  | 0  | 57  | 957,87  | 63,98  |

|   |   |     |     |    |    |     |         |        |
|---|---|-----|-----|----|----|-----|---------|--------|
| 0 | 0 | 7   | 11  | 16 | 0  | 54  | 219,16  | 188,4  |
| 0 | 0 | 19  | 4   | 0  | 0  | 0   | 617,02  | 173,58 |
| 0 | 0 | 92  | 91  | 10 | 0  | 36  | 556,24  | 282,7  |
| 0 | 0 | 52  | 24  | 14 | 1  | 63  | 823,23  | 87,66  |
| 0 | 1 | 30  | 22  | 9  | 0  | 37  | 597,14  | 46,42  |
| 0 | 1 | 42  | 26  | 29 | 2  | 139 | 342,54  | 177,02 |
| 0 | 0 | 24  | 19  | 12 | 0  | 40  | 932,91  | 93,39  |
| 0 | 1 | 116 | 60  | 11 | 1  | 24  | 1135,11 | 524,95 |
| 0 | 0 | 74  | 30  | 11 | 1  | 53  | 416,15  | 128,9  |
| 1 | 0 | 60  | 14  | 16 | 0  | 58  | 213,35  | 347,72 |
| 0 | 0 | 107 | 99  | 3  | 0  | 13  | 518,62  | 283,56 |
| 0 | 0 | 44  | 70  | 2  | 0  | 12  | 403,84  | 288,14 |
| 0 | 0 | 118 | 14  | 9  | 6  | 49  | 713,03  | 446,81 |
| 0 | 0 | 79  | 13  | 1  | 0  | 7   | 863,33  | 193,06 |
| 0 | 0 | 33  | 2   | 0  | 0  | 0   | 477,85  | 57,87  |
| 1 | 1 | 104 | 19  | 4  | 2  | 27  | 107,9   | 252,63 |
| 1 | 1 | 33  | 2   | 4  | 0  | 16  | 643,38  | 308,19 |
| 1 | 0 | 26  | 3   | 0  | 0  | 12  | 92,44   | 0      |
| 1 | 1 | 46  | 22  | 1  | 0  | 0   | 161,59  | 206,23 |
| 1 | 1 | 33  | 10  | 0  | 0  | 37  | 1047,66 | 217,47 |
| 0 | 1 | 77  | 18  | 23 | 4  | 124 | 603,15  | 195,92 |
| 1 | 1 | 35  | 6   | 6  | 0  | 12  | 150,46  | 68,18  |
| 1 | 1 | 36  | 2   | 19 | 1  | 79  | 52,88   | 0      |
| 1 | 1 | 29  | 7   | 0  | 0  | 22  | 815,78  | 421,61 |
| 1 | 1 | 73  | 48  | 9  | 0  | 39  | 420,72  | 245,76 |
| 1 | 1 | 46  | 8   | 0  | 0  | 3   | 413,51  | 226,28 |
| 1 | 1 | 94  | 76  | 50 | 11 | 196 | 953,23  | 639,28 |
| 1 | 1 | 105 | 15  | 5  | 0  | 17  | 391,55  | 154,11 |
| 1 | 1 | 42  | 0   | 0  | 0  | 0   | 351,7   | 85,94  |
| 0 | 0 | 60  | 121 | 32 | 14 | 229 | 974,16  | 6,89   |
| 1 | 1 | 113 | 0   | 0  | 0  | 0   | 557,26  | 468,01 |
| 1 | 1 | 67  | 0   | 0  | 0  | 0   | 123,56  | 49,85  |
| 0 | 0 | 45  | 2   | 0  | 0  | 0   | 27,27   | 33,82  |
| 0 | 0 | 39  | 0   | 0  | 0  | 0   | 88,17   | 52,72  |
| 0 | 0 | 2   | 0   | 0  | 0  | 0   | 229,14  | 405,57 |
| 0 | 0 | 108 | 85  | 54 | 54 | 590 | 1185    | 228    |
| 0 | 0 | 14  | 0   | 0  | 0  | 0   | 67,64   | 85,6   |
| 0 | 0 | 34  | 0   | 0  | 0  | 0   | 66,9    | 52,15  |
| 0 | 0 | 49  | 55  | 0  | 0  | 0   | 82,66   | 249,76 |
| 0 | 0 | 94  | 63  | 8  | 0  | 24  | 384,49  | 88,23  |
| 0 | 0 | 78  | 55  | 27 | 1  | 84  | 795,99  | 202,22 |
| 0 | 0 | 100 | 94  | 4  | 0  | 17  | 1433,29 | 184,46 |
| 0 | 0 | 50  | 11  | 2  | 0  | 4   | 179,16  | 189,05 |
| 1 | 1 | 25  | 6   | 0  | 0  | 0   | 102,17  | 91,67  |
| 0 | 0 | 7   | 21  | 2  | 0  | 0   | 815,04  | 323,08 |
| 0 | 0 | 42  | 29  | 8  | 0  | 32  | 583,72  | 409,85 |
| 0 | 0 | 47  | 8   | 0  | 0  | 0   | 746,21  | 425,16 |
| 0 | 0 | 21  | 9   | 0  | 0  | 0   | 219,95  | 405,26 |
| 1 | 1 | 7   | 3   | 2  | 1  | 16  | 133,25  | 370,05 |
| 1 | 1 | 68  | 11  | 0  | 0  | 0   | 1233,03 | 879,79 |

|   |   |     |    |    |    |     |         |        |
|---|---|-----|----|----|----|-----|---------|--------|
| 1 | 1 | 54  | 2  | 2  | 0  | 8   | 91,98   | 128,2  |
| 1 | 1 | 17  | 9  | 12 | 0  | 47  | 286,87  | 350,15 |
| 1 | 1 | 36  | 8  | 0  | 0  | 0   | 678,24  | 309,59 |
| 1 | 1 | 62  | 1  | 2  | 0  | 8   | 573,19  | 86,87  |
| 1 | 1 | 50  | 17 | 0  | 0  | 0   | 416,15  | 135,85 |
| 1 | 1 | 60  | 6  | 2  | 0  | 8   | 114,99  | 112,12 |
| 0 | 1 | 46  | 15 | 2  | 0  | 0   | 87,33   | 164,94 |
| 1 | 1 | 95  | 65 | 8  | 0  | 22  | 1475,49 | 637,17 |
| 1 | 1 | 47  | 68 | 8  | 0  | 35  | 788,78  | 167,23 |
| 1 | 1 | 68  | 52 | 5  | 0  | 20  | 474,82  | 288,16 |
| 1 | 1 | 110 | 53 | 3  | 0  | 16  | 318,79  | 304,23 |
| 1 | 1 | 36  | 0  | 0  | 0  | 0   | 87,45   | 117,48 |
| 1 | 1 | 74  | 0  | 0  | 0  | 0   | 197,12  | 288,16 |
| 1 | 1 | 82  | 2  | 0  | 0  | 0   | 307,12  | 301,17 |
| 1 | 1 | 84  | 82 | 0  | 0  | 0   | 164,26  | 193,25 |
| 1 | 1 | 82  | 2  | 0  | 0  | 0   | 375,84  | 251,42 |
| 1 | 1 | 64  | 38 | 39 | 6  | 0   | 850     | 483,33 |
| 1 | 1 | 76  | 46 | 37 | 14 | 0   | 428,05  | 214,68 |
| 0 | 0 | 104 | 52 | 58 | 3  | 0   | 532,48  | 99,11  |
| 0 | 0 | 100 | 34 | 92 | 7  | 0   | 848,52  | 40,95  |
| 1 | 0 | 76  | 73 | 7  | 5  | 63  | 1047,09 | 374,11 |
| 0 | 0 | 73  | 77 | 16 | 8  | 108 | 1188,51 | 623,39 |
| 0 | 0 | 94  | 31 | 23 | 3  | 95  | 449,19  | 431,28 |
| 0 | 0 | 43  | 23 | 24 | 0  | 99  | 934,14  | 200,91 |
| 1 | 0 | 74  | 77 | 9  | 0  | 24  | 917,37  | 368,52 |
| 0 | 0 | 43  | 38 | 0  | 0  | 0   | 849,44  | 393,02 |
| 0 | 0 | 36  | 21 | 8  | 0  | 33  | 265,77  | 604,26 |
| 0 | 0 | 103 | 58 | 7  | 3  | 51  | 1353,97 | 426,69 |
| 0 | 0 | 49  | 43 | 2  | 0  | 0   | 1112,66 | 301,94 |
| 0 | 0 | 55  | 54 | 21 | 0  | 89  | 1329,24 | 377,71 |
| 0 | 0 | 87  | 68 | 35 | 4  | 173 | 1362,17 | 256,01 |
| 1 | 0 | 74  | 54 | 20 | 2  | 100 | 351,06  | 62,38  |
| 0 | 0 | 18  | 6  | 0  | 0  | 0   | 60,81   | 153,8  |
| 0 | 0 | 16  | 46 | 4  | 0  | 16  | 65,67   | 267,49 |
| 0 | 0 | 104 | 79 | 12 | 2  | 64  | 215,6   | 60,08  |
| 0 | 1 | 83  | 55 | 11 | 1  | 55  | 462,88  | 388,06 |
| 0 | 0 | 105 | 83 | 11 | 1  | 55  | 561,33  | 441,47 |
| 1 | 1 | 0   | 0  | 10 | 0  | 40  | 60,28   | 116,18 |
| 0 | 1 | 68  | 69 | 32 | 9  | 160 | 645,73  | 337,87 |
| 1 | 1 | 50  | 29 | 5  | 2  | 32  | 210,94  | 228,58 |
| 0 | 1 | 80  | 56 | 24 | 3  | 103 | 262,88  | 416,15 |
| 1 | 1 | 70  | 49 | 20 | 0  | 84  | 403,84  | 162,06 |
| 0 | 1 | 86  | 39 | 5  | 0  | 22  | 212,48  | 292,05 |
| 1 | 1 | 76  | 21 | 14 | 2  | 60  | 157,03  | 359,98 |
| 1 | 1 | 71  | 40 | 3  | 3  | 32  | 117,21  | 182,96 |
| 1 | 1 | 65  | 6  | 5  | 0  | 20  | 31,53   | 47,74  |
| 1 | 1 | 72  | 34 | 11 | 2  | 55  | 475,68  | 452,73 |
| 1 | 1 | 56  | 59 | 10 | 4  | 70  | 603,15  | 0      |
| 1 | 1 | 73  | 34 | 11 | 4  | 75  | 600,41  | 299,23 |
| 1 | 1 | 77  | 31 | 2  | 0  | 9   | 846,29  | 353,45 |

|   |   |    |    |    |    |     |         |         |
|---|---|----|----|----|----|-----|---------|---------|
| 1 | 1 | 24 | 38 | 13 | 0  | 59  | 50,65   | 94,78   |
| 1 | 1 | 24 | 16 | 4  | 0  | 18  | 52,49   | 16,04   |
| 1 | 1 | 77 | 29 | 15 | 2  | 79  | 840,76  | 337,12  |
| 1 | 1 | 69 | 30 | 1  | 0  | 0   | 661,78  | 596,44  |
| 1 | 1 | 75 | 61 | 9  | 1  | 52  | 1062,2  | 33,64   |
| 0 | 0 | 12 | 20 | 9  | 4  | 68  | 192,95  | 0,26    |
| 1 | 1 | 90 | 49 | 9  | 1  | 43  | 45,54   | 222,15  |
| 1 | 1 | 54 | 31 | 11 | 5  | 84  | 362,08  | 713,37  |
| 1 | 1 | 27 | 14 | 12 | 0  | 53  | 845,76  | 331,89  |
| 1 | 1 | 19 | 15 | 3  | 1  | 18  | 241,12  | 253,51  |
| 1 | 1 | 32 | 10 | 4  | 1  | 23  | 1065,36 | 1220,91 |
| 0 | 1 | 21 | 34 | 18 | 2  | 75  | 426,11  | 163,36  |
| 0 | 1 | 22 | 10 | 13 | 0  | 58  | 785,92  | 287,47  |
| 0 | 0 | 82 | 20 | 20 | 0  | 84  | 1312,51 | 313,6   |
| 0 | 0 | 37 | 12 | 5  | 1  | 29  | 627,2   | 250,89  |
| 0 | 0 | 50 | 23 | 12 | 3  | 69  | 342,54  | 326,01  |
| 0 | 0 | 18 | 3  | 1  | 0  | 4   | 41,11   | 54,93   |
| 0 | 0 | 58 | 6  | 12 | 3  | 73  | 740,12  | 299,88  |
| 0 | 0 | 68 | 31 | 15 | 0  | 60  | 451,65  | 245,67  |
| 0 | 0 | 16 | 16 | 5  | 0  | 20  | 128,37  | 250,89  |
| 0 | 0 | 49 | 28 | 7  | 0  | 28  | 18,36   | 0       |
| 0 | 1 | 18 | 20 | 3  | 0  | 95  | 312,47  | 276,37  |
| 0 | 0 | 29 | 5  | 12 | 6  | 9   | 1090,89 | 551,37  |
| 0 | 0 | 28 | 7  | 2  | 0  | 97  | 270,15  | 224,76  |
| 0 | 0 | 40 | 16 | 15 | 5  | 0   | 768,94  | 8,55    |
| 1 | 0 | 26 | 21 | 0  | 0  | 9   | 1071,64 | 712,06  |
| 1 | 0 | 12 | 24 | 0  | 1  | 0   | 1076,15 | 1491,99 |
| 0 | 0 | 9  | 4  | 0  | 0  | 0   | 195,78  | 104,57  |
| 0 | 0 | 12 | 6  | 0  | 0  | 0   | 21,49   | 103,92  |
| 0 | 0 | 16 | 8  | 0  | 0  | 3   | 33,14   | 0       |
| 0 | 0 | 34 | 57 | 0  | 0  | 0   | 545,22  | 52,62   |
| 0 | 0 | 21 | 7  | 0  | 0  | 0   | 817,26  | 491,14  |
| 0 | 0 | 15 | 18 | 0  | 0  | 0   | 780,22  | 258,14  |
| 0 | 0 | 30 | 28 | 2  | 0  | 0   | 1112,85 | 245,08  |
| 0 | 0 | 71 | 86 | 0  | 0  | 20  | 1104,19 | 170,16  |
| 0 | 0 | 61 | 43 | 4  | 0  | 0   | 1025,29 | 64,31   |
| 0 | 0 | 16 | 15 | 2  | 2  | 0   | 903,06  | 457,46  |
| 0 | 0 | 8  | 8  | 0  | 0  | 0   | 1078,84 | 479,46  |
| 0 | 0 | 12 | 0  | 0  | 0  | 10  | 275,61  | 267,07  |
| 1 | 1 | 57 | 57 | 1  | 0  | 10  | 1163,13 | 185,96  |
| 1 | 1 | 55 | 53 | 2  | 0  | 0   | 568,52  | 138,54  |
|   |   | 19 | 6  | 0  | 0  | 0   | 981,51  | 287,69  |
| 1 | 1 | 56 | 56 | 0  | 0  | 10  | 946,39  | 215,52  |
| 1 | 1 | 26 | 21 | 2  | 0  | 4   | 378,59  | 240,26  |
| 1 | 1 | 41 | 20 | 21 | 0  | 36  | 45,64   | 285,63  |
| 0 | 1 | 20 | 18 | 12 | 0  | 124 | 409,76  | 322,06  |
| 0 | 0 | 34 | 43 | 35 | 0  | 117 | 702,09  | 152,28  |
| 0 | 0 | 23 | 11 | 11 | 10 | 202 | 384,49  | 497,33  |
| 1 | 1 | 46 | 40 | 51 | 0  | 78  | 744,17  | 513,14  |
| 0 | 0 | 33 | 45 | 23 | 0  | 53  | 833,72  | 258,82  |



|   |   |     |    |    |    |     |         |        |
|---|---|-----|----|----|----|-----|---------|--------|
| 0 | 1 | 7   | 7  | 15 | 0  | 146 | 12,88   | 15,5   |
| 0 | 0 | 39  | 31 | 25 | 6  | 37  | 496,46  | 169,47 |
| 0 | 0 | 22  | 14 | 11 | 0  | 178 | 488,4   | 497,33 |
| 1 | 1 | 30  | 22 | 41 | 0  |     | 337,9   | 244,39 |
| 1 | 1 | 20  | 20 | 20 | 0  | 64  | 152,59  | 111,73 |
| 1 | 1 | 31  | 31 | 16 | 0  | 59  | 299,4   | 117,92 |
| 0 | 1 | 45  | 57 | 17 | 0  | 238 | 669,65  | 0      |
| 1 | 1 | 47  | 55 | 37 | 14 | 209 | 1132,07 | 0      |
| 1 | 1 | 79  | 90 | 51 | 0  | 50  | 1793,37 | 385,98 |
| 1 | 1 | 22  | 33 | 25 | 0  | 48  | 87,45   | 455,4  |
| 1 | 1 | 1   | 17 | 12 | 0  | 93  | 105,96  | 379,11 |
| 1 | 1 | 54  | 22 | 23 | 0  | 57  | 666,62  | 95,92  |
| 0 | 1 | 53  | 27 | 12 | 1  | 40  | 345,99  | 241,2  |
| 1 | 1 | 47  | 8  | 10 | 0  | 90  | 143,7   | 344,05 |
| 1 | 1 | 56  | 24 | 27 | 0  | 34  | 278,13  | 301,44 |
| 1 | 1 | 12  | 13 | 5  | 2  | 22  | 394,41  | 205,9  |
| 0 | 1 | 44  | 12 | 6  | 1  | 171 | 1163,18 | 40,25  |
| 1 | 1 | 60  | 37 | 38 | 1  | 92  | 763,37  | 463,65 |
| 1 | 1 | 15  | 19 | 13 | 0  | 98  | 103,48  | 351,61 |
| 1 | 1 | 12  | 13 | 21 | 2  | 56  | 43,77   | 469,15 |
| 1 | 1 | 20  | 20 | 0  | 0  | 66  | 200,65  | 237,56 |
| 1 | 1 | 17  | 23 | 15 | 1  | 218 | 44,71   | 131,96 |
| 1 | 1 | 17  | 27 | 52 | 0  | 114 | 412,38  | 766,76 |
| 0 | 0 | 44  | 4  | 28 | 0  | 41  | 103,06  | 477,88 |
| 0 | 0 | 39  | 2  | 7  | 2  | 124 | 12,71   | 89,47  |
| 0 | 0 | 52  | 20 | 35 | 2  | 267 | 1137,65 | 130,14 |
| 0 | 0 | 61  | 26 | 60 | 3  | 93  | 10,58   | 179,29 |
| 0 | 0 | 30  | 15 | 21 | 0  | 64  | 687,55  | 380,78 |
| 0 | 0 | 51  | 18 | 18 | 0  | 130 | 255,57  | 36,07  |
| 1 | 1 | 19  | 6  | 32 | 0  | 117 | 800,34  | 220,56 |
| 0 | 0 | 98  | 18 | 28 | 0  | 57  | 1054,18 | 684,83 |
| 0 | 1 | 61  | 18 | 16 | 0  | 28  | 350,42  | 581,66 |
| 0 | 0 | 74  | 21 | 9  | 0  | 0   | 546,22  | 289,75 |
| 0 | 0 | 93  | 40 | 13 | 2  | 271 | 866,02  | 133,17 |
| 0 | 0 | 52  | 51 | 43 | 12 | 259 | 1228,49 | 31,21  |
| 1 | 0 | 74  | 43 | 62 | 0  | 158 | 722,83  | 11,79  |
| 0 | 0 | 31  | 45 | 43 | 0  | 84  | 783,06  | 409,91 |
| 1 | 0 | 112 | 28 | 26 | 0  | 214 | 223,99  | 124,67 |
| 0 | 0 | 32  | 43 | 34 | 9  | 219 | 746,89  | 16,65  |
| 0 | 0 | 31  | 48 | 41 | 6  | 56  | 24,73   | 0      |
| 1 | 0 | 23  | 19 | 15 | 0  | 24  | 873,35  | 635,68 |
| 0 | 1 | 42  | 9  | 10 | 0  | 80  | 114,32  | 8,15   |
| 0 | 0 | 26  | 17 | 20 | 0  | 56  | 26,65   | 0,87   |
| 1 | 1 | 18  | 17 | 14 | 0  | 53  | 1079,57 | 25,75  |
| 0 | 1 | 51  | 23 | 19 | 0  | 143 | 41,74   | 64,59  |
| 0 | 1 | 38  | 32 | 28 | 3  | 50  | 1141,94 | 209,64 |
| 1 | 1 | 26  | 18 | 12 | 0  | 64  | 992,52  | 56,1   |
| 0 | 0 | 18  | 21 | 18 | 0  | 64  | 1190,41 | 953,69 |
| 0 | 0 | 58  | 10 | 17 | 0  | 68  | 786,63  | 173,23 |
| 1 | 1 | 10  | 10 | 17 | 0  | 42  | 1235,44 | 26,36  |

|   |   |   |    |    |   |    |        |        |
|---|---|---|----|----|---|----|--------|--------|
| 0 | 0 | 0 | 10 | 10 | 0 | 26 | 468,81 | 659,95 |
|---|---|---|----|----|---|----|--------|--------|

| MPO    | TIMP-1 | MMP-8/ | TMMP-9/ | TPro  | MMP-Active | MMP-8 |
|--------|--------|--------|---------|-------|------------|-------|
| 848,5  | 270,4  | 0,85   | 0,37    | 7,52  | 23,42      |       |
| 4419,8 | 172,53 | 1,26   | 0,58    | 8,95  | 37,04      |       |
| 1610,4 | 107,04 | 1,75   | 0,59    | 9,43  | 35,17      |       |
| 1594,5 | 173,78 | 0,25   | 0,05    | 6,99  | 25,34      |       |
| 3658   | 69,52  | 4,59   | 1,67    | 8,92  | 33,61      |       |
| 2777   | 128,46 | 2,22   | 0,27    | 8,7   | 33,92      |       |
| 705,7  | 214,56 | 0,84   | 0,36    | 8,09  | 25,52      |       |
| 0      | 157,98 | 0,29   | 0,43    | 8,08  | 18,82      |       |
| 4070,6 | 59,76  | 5,24   | 0,35    | 9,89  | 39,99      |       |
| 3904   | 85,1   | 2,2    | 1,7     | 9,6   | 33,4       |       |
| 1558,8 | 83,23  | 2,05   | 2,3     | 8,96  | 20,32      |       |
| 221,6  | 308,47 | 0,54   | 0,04    | 8,05  | 12,23      |       |
| 3554,8 | 38,67  | 7,89   | 4,09    | 11,41 | 8,95       |       |
| 237,5  | 577,41 | 0,07   | 0,07    | 6,08  | 0          |       |
| 427,9  | 175,5  | 0,48   | 0,49    | 3,94  | 0          |       |
| 1094,6 | 207,22 | 0,91   | 0,28    | 7,21  | 6,85       |       |
| 0      | 226,19 | 0,27   | 0,01    | 7,42  | 0          |       |
| 213,6  | 223,76 | 0,57   | 0,18    | 7,92  | 0,53       |       |
| 1376,3 | 168,07 | 0,63   | 0,11    | 8,16  | 3,14       |       |
| 257,3  | 179,14 | 0,73   | 0,53    | 9,84  | 8,93       |       |
| 1078,7 | 110,98 | 2,68   | 0,88    | 9,5   | 5,57       |       |
| 51     | 209,71 | 0,35   | 0,08    | 9,65  | 19,71      |       |
| 1626,3 | 90,53  | 2,63   | 0,92    | 9,64  | 23,55      |       |
| 0      | 143,41 | 0,12   | 0,22    | 7,53  | 10,35      |       |
| 1372,3 | 115,92 | 3,08   | 0,78    | 9,56  | 21,02      |       |
| 420    | 57,97  | 2,72   | 0,69    | 7,52  | 12,8       |       |
| 1562,8 | 81,59  | 4,6    | 1,05    | 10,58 | 23,99      |       |
| 3784,9 | 28,77  | 10,85  | 6,48    | 7,32  | 39,87      |       |
| 447,8  | 186,68 | 0,13   | 0,01    | 3,98  | 31,89      |       |
| 4542,8 | 35,43  | 7,58   | 0,96    | 8,59  | 42,82      |       |
| 2269,1 | 190,02 | 2,05   | 0,51    | 6,01  | 42,83      |       |
| 1507,2 | 231,51 | 0,87   | 0,27    | 3,97  | 14,81      |       |
| 987,4  | 118,02 | 1,52   | 0,48    | 8,32  | 3,33       |       |
| 344,6  | 157,11 | 0,57   | 0,21    | 4,25  | 1,58       |       |
| 1789   | 224,94 | 1,42   | 0,18    | 6,98  | 21,35      |       |
| 4836,5 | 106,45 | 4,25   | 1,06    | 11,38 | 19,17      |       |
| 1412   | 169,19 | 0,52   | 0,12    | 7,39  | 13,89      |       |
| 253,3  | 169,32 | 0,16   | 0,2     | 7,61  | 2,52       |       |
| 590,6  | 146,09 | 0,91   | 0,54    | 10,85 | 11,8       |       |
| 396,4  | 159,22 | 1,35   | 0,29    | 7,75  | 14,51      |       |
| 407    | 147,33 | 0,57   | 0,16    | 6,84  | 1,6        |       |
| 670,8  | 104,67 | 0,77   | 0,65    | 11,72 | 7,91       |       |
| 494    | 141,92 | 0,86   | 0,51    | 8,7   | 10         |       |
| 662,5  | 235,97 | 0,29   | 0,01    | 10,88 | 7,49       |       |
| 304,7  | 113,71 | 0,1    | 0,16    | 5,11  | 5,43       |       |
| 360,6  | 235,99 | 0,03   | 0       | 4,48  | 4,13       |       |
| 269,8  | 198,1  | 0,18   | 0,36    | 2,08  | 24,33      |       |
| 647    | 270,7  | 0,12   | 0,13    | 6,43  | 9,94       |       |
| 1032,2 | 209,99 | 0,7    | 0,31    | 10,42 | 23,87      |       |

|        |        |       |      |       |       |
|--------|--------|-------|------|-------|-------|
| 647    | 200,03 | 0,4   | 0,01 | 5,94  | 5,76  |
| 1496,5 | 141,51 | 0,47  | 1,26 | 10,21 | 20,24 |
| 802,7  | 144,04 | 0,62  | 0,13 | 0,62  | 0     |
| 1003,2 | 235,85 | 0,59  | 0,07 | 6,7   | 0     |
| 1966,1 | 43,72  | 2,46  | 4,78 | 14,64 | 5,8   |
| 2731,1 | 55,64  | 9,19  | 0,5  | 11,93 | 17,13 |
| 362,1  | 180,73 | 0,32  | 0,51 | 12,54 | 13,74 |
| 457,1  | 73,85  | 3,56  | 1,98 | 12,2  | 12,57 |
| 684    | 134,63 | 0,88  | 0,19 | 10,54 | 11,37 |
| 1995,1 | 95,69  | 6,89  | 4,26 | 17    | 47,53 |
| 834,3  | 98,84  | 1,31  | 0,7  | 13,45 | 29,15 |
| 0      | 172,64 | 0,01  | 0    | 2,85  | 37,35 |
| 0      | 170,83 | 0,05  | 0,05 | 8,93  | 8,47  |
| 348,9  | 380,96 | 0,03  | 0    | 3,96  | 8,68  |
| 916,1  | 133,1  | 0,67  | 0,19 | 8,71  | 23,12 |
| 641,8  | 82,99  | 0,53  | 1,15 | 10,16 | 22,64 |
| 1092,9 | 55,45  | 3,59  | 3,36 | 13,76 | 32,08 |
| 549,4  | 271,93 | 0,36  | 0,33 | 11,03 | 30,95 |
| 1330,3 | 267,42 | 0,72  | 0,11 | 12,55 | 40,24 |
| 40,3   | 209,4  | 0,32  | 0,01 | 8,01  | 15,8  |
| 2148,1 | 277,29 | 1,01  | 0,1  | 14,19 | 16,09 |
| 3820,7 | 42,06  | 11,76 | 2,93 | 19,74 | 34,63 |
| 2224,6 | 40,95  | 8,05  | 5,04 | 19,6  | 19,99 |
| 855,4  | 222,63 | 0,6   | 0,22 | 14,19 | 12,2  |
| 1609,9 | 342,89 | 0,49  | 0,28 | 14,49 | 5,2   |
| 992,6  | 180,34 | 1,26  | 0,59 | 6,22  | 0     |
| 404,3  | 122,03 | 0,1   | 0,14 | 4,47  | 10,33 |
| 2010,9 | 31,22  | 4,62  | 7,83 | 10,04 | 33,28 |
| 699,8  | 211,03 | 1,18  | 0,5  | 5,36  | 0     |
| 2280   | 143,28 | 1,54  | 1,93 | 4,79  | 0     |
| 1123,7 | 182,22 | 1,17  | 0,24 | 4,83  | 5,77  |
| 480,8  | 217,75 | 0,57  | 0,37 | 13    | 17,41 |
| 693,3  | 73,59  | 5,76  | 0,89 | 12,97 | 12,75 |
| 564,7  | 148,16 | 0,21  | 0,17 | 6,04  | 11,5  |
| 645,7  | 238,11 | 0,03  | 0    | 5,81  | 0     |
| 1042,7 | 210,78 | 0,06  | 0,95 | 8,3   | 0     |
| 1520,7 | 236,56 | 0,09  | 0,17 | 5,7   | 4,56  |
| 1707,9 | 253,89 | 0,95  | 0,21 | 12,67 | 13,6  |
| 1232,8 | 469,16 | 0,29  | 0,07 | 8,03  | 21,05 |
| 547,9  | 192    | 0,35  | 0,52 | 11,49 | 16,33 |
| 1805,8 | 551,96 | 0,12  | 0,22 | 15,14 | 12,35 |
| 1920,4 | 208,04 | 0,36  | 0,05 | 14,61 | 12,57 |
| 726,8  | 288,57 | 0,22  | 0,2  | 11,88 | 9,13  |
| 290,8  | 284,48 | 0,03  | 0,15 | 7,14  | 5,04  |
| 6627,6 | 86,44  | 4,64  | 0,51 | 10,62 | 32,44 |
| 701,7  | 215,59 | 0,16  | 0,37 | 7,36  | 8,35  |
| 1372,5 | 362,6  | 1,32  | 0,22 | 10,96 | 33,65 |
| 494,8  | 180,05 | 0,06  | 0    | 2,64  | 3,91  |
| 1087,4 | 122,03 | 0,69  | 0,35 | 3,53  | 0     |
| 469,6  | 166,43 | 0,04  | 0,05 | 2,68  | 0     |

|         |        |      |      |       |       |
|---------|--------|------|------|-------|-------|
| 3102,8  | 189,71 | 2,46 | 0,97 | 14,79 | 5,14  |
| 2373,2  | 245,04 | 0,51 | 0,13 | 13,91 | 3,04  |
| 729,6   | 253,88 | 0,25 | 0,17 | 6,55  | 3,51  |
| 986,8   | 307,23 | 0,24 | 0,14 | 12,74 | 1,79  |
| 2585,7  | 317,26 | 1,05 | 0,03 | 14,28 | 15,82 |
| 3228,6  | 263,37 | 0,19 | 0,19 | 2,91  | 6     |
| 2513    | 91,61  | 3,41 | 0,96 | 2,09  | 32,09 |
| 799,5   | 165    | 0,63 | 1,07 | 3,09  | 3,12  |
| 1501,1  | 126,96 | 3,7  | 1,88 | 7,6   | 17,73 |
| 749,2   | 289,99 | 0,27 | 0,05 | 8,79  | 2,08  |
| 3491,3  | 99,59  | 4,67 | 2,53 | 17,68 | 12,48 |
| 2180,3  | 394,13 | 0,13 | 0    | 3,66  | 12,97 |
| 2146,8  | 145,63 | 1,56 | 1,14 | 14,11 | 1,04  |
| 3446,6  | 254,53 | 2,1  | 1,59 | 17,57 | 9,74  |
| 1668,8  | 205,66 | 0,18 | 0    | 10,99 | 2,09  |
| 1884    | 141,56 | 1,92 | 1,17 | 16,08 | 4,79  |
| 715,6   | 288,4  | 0,13 | 0,25 | 17,33 | 4,29  |
| 2090,9  | 194,26 | 1,65 | 0,92 | 17,16 | 3,81  |
| 2358,69 | 260,95 | 0,17 | 0,39 | 16    | 8,06  |
| 549,77  | 379,78 | 0,04 | 0,19 | 6,6   | 0     |
| 337,53  | 165,5  | 0,01 | 0    | 2,89  | 1,24  |
| 859,96  | 130,28 | 1,57 | 0,25 | 6,98  | 5,28  |
| 683,64  | 253,59 | 0,07 | 0,35 | 7,23  | 7,39  |
| 1493,41 | 142,82 | 1,86 | 0,82 | 9,38  | 3,16  |
| 2495,83 | 261,39 | 1,27 | 0,22 | 9,92  | 2,98  |
| 1630,55 | 229,79 | 0,71 | 0,16 | 3,23  | 0     |
| 3282,74 | 146,47 | 2,79 | 0,21 | 6,97  | 2,19  |
| 6283,46 | 133,32 | 3,85 | 3,93 | 16,88 | 26,75 |
| 3638,65 | 195,29 | 2,4  | 0,64 | 17,01 | 11,66 |
| 1450,97 | 349,77 | 0,28 | 0,13 | 7,52  | 3,84  |
| 2006,05 | 202,28 | 1,63 | 0,35 | 7,21  | 3,79  |
| 4379,85 | 175,16 | 2,93 | 0,82 | 10,47 | 15,13 |
| 4219,86 | 79,26  | 6,03 | 1,83 | 17,44 | 15,09 |
| 1826,46 | 323,44 | 0,39 | 0,16 | 8,27  | 3,56  |
| 1281,18 | 238,45 | 1,13 | 0,15 | 6,25  | 2,81  |
| 2835,41 | 248,29 | 2,1  | 0,1  | 11,91 | 7,64  |
| 2600,32 | 402,96 | 0,88 | 0,11 | 7,65  | 2,42  |
| 4846,77 | 259,04 | 1,2  | 0,32 | 12,67 | 30,54 |
| 1872,18 | 245,1  | 0,42 | 0,06 | 1,33  | 0     |
| 4902,28 | 461,42 | 1,15 | 0,26 | 6,7   | 0     |
| 3739,87 | 368,41 | 1,32 | 0,03 | 5,53  | 0     |
| 3984,76 | 217,16 | 2,04 | 0,26 | 8,08  | 0,62  |
| 7279,35 | 239,89 | 2,4  | 0,15 | 11,6  | 6,16  |
| 2982,34 | 606,17 | 0,17 | 0,16 | 13,87 | 5,99  |
| 582,42  | 137,75 | 0,87 | 0,89 | 4,28  | 1,31  |
| 1555,45 | 329,35 | 0,84 | 0,52 | 10,64 | 0,79  |
| 1565,25 | 219,3  | 0,49 | 0,18 | 5,24  | 1,32  |
| 2022,38 | 288,97 | 1,26 | 0,41 | 9,72  | 0,63  |
| 3063,97 | 118,2  | 2,32 | 1,35 | 16,18 | 7,62  |
| 311,41  | 265,24 | 0,15 | 0,2  | 6,67  | 1,04  |

|         |        |       |       |       |       |
|---------|--------|-------|-------|-------|-------|
| 1082    | 136,21 | 2,46  | 0,82  | 1,43  | 0     |
| 1245,26 | 117,8  | 1,98  | 2,2   | 2,83  | 0     |
| 1170,16 | 388,5  | 0,33  | 0,08  | 0,26  | 0     |
| 814,25  | 113,69 | 0,96  | 1,73  | 5,11  | 1,31  |
| 1339,95 | 136,95 | 1,93  | 0,44  | 12,57 | 1,83  |
| 1023,22 | 165,96 | 1,42  | 0,28  | 4,48  | 0     |
| 745,68  | 108,86 | 0,72  | 0,82  | 4,32  | 0     |
| 288,55  | 172,27 | 0,36  | 0,09  | 0,83  | 0     |
| 2188,9  | 441,33 | 0,95  | 0,19  | 1,72  | 0     |
| 1305,1  | 84,79  | 4,07  | 1,67  | 8,85  | 0     |
| 810,6   | 349,68 | 0,04  | 0,13  | 1,81  | 0     |
| 1903,3  | 131,4  | 2,56  | 1,21  | 10    | 0     |
| 1515,2  | 309,58 | 0,33  | 0,03  | 8,77  | 0     |
| 1105,7  | 217,96 | 0,32  | 0,23  | 3,85  | 0     |
| 1071,2  | 512,41 | 0,01  | 0,09  | 0,52  | 26,04 |
| 3320,5  | 23,87  | 18,51 | 11,44 | 0,56  | 26,83 |
| 690,9   | 209,46 | 0,47  | 0,39  | 0     | 0     |
| 709,6   | 125,17 | 1,48  | 0,57  | 0     | 0     |
| 584,6   | 166,56 | 0,14  | 0,54  | 0,03  | 0     |
| 2262,3  | 164,45 | 2,27  | 0,25  | 2,19  | 25,74 |
| 3955,9  | 378,39 | 0,75  | 0,05  | 1,07  | 0     |
| 348     | 204,79 | 0,06  | 0,26  | 0     | 0     |
| 422,4   | 195,72 | 0,01  | 0     | 0,4   | 0     |
| 762,7   | 319,47 | 0,03  | 0,08  | 3,15  | 0     |
| 387,8   | 154,83 | 0,03  | 0,17  | 0,78  | 0     |
| 1475,3  | 148,84 | 2,76  | 1,29  | 1,82  | 0     |
| 457     | 814,76 | 0,03  | 0     | 8,5   | 29,07 |
| 4397,3  | 324,5  | 1,76  | 0,8   | 11,8  | 26,83 |
| 446,3   | 254,75 | 0,1   | 0,05  | 7,28  | 4,32  |
| 4229,8  | 211,86 | 2,48  | 0,36  | 13,09 | 26,45 |
| 1251,9  | 147,27 | 0,83  | 0,59  | 9,32  | 5,51  |
| 1267,9  | 86,49  | 3,37  | 1,05  | 8,51  | 16,14 |
| 946,2   | 114,71 | 1     | 0,5   | 5,87  | 0,6   |
| 645,7   | 619,49 | 0,01  | 0     | 5,69  | 6,35  |
| 4524,9  | 182,34 | 2,89  | 0,56  | 7,87  | 22,89 |
| 576,6   | 109,63 | 0,19  | 0     | 1,26  | 1,02  |
| 1451,4  | 171,4  | 0,32  | 0,16  | 6,23  | 3,01  |
| 464,9   | 228    | 0,05  | 0,05  | 2,21  | 0     |
| 5327,9  | 24,08  | 24,61 | 9,31  | 4,27  | 13,39 |
| 1557,7  | 267,55 | 0,11  | 0,08  | 2,97  | 0,21  |
| 898,3   | 137,65 | 0,81  | 0,78  | 2,3   | 0     |
| 927,6   | 328,41 | 0,06  | 0,23  | 3,63  | 8,35  |
| 3384,3  | 286,86 | 1,1   | 0,28  | 3,46  | 7,65  |
| 507,5   | 184,55 | 0,09  | 0,06  | 0,36  | 7,56  |
| 3823    | 544,02 | 0,39  | 0,14  | 4,02  | 10,47 |
| 2267,6  | 149,44 | 2,09  | 0,96  | 3,62  | 3,06  |
| 2015    | 165,86 | 0,3   | 0,15  | 3,43  | 3,99  |
| 1220    | 443,8  | 0,06  | 0,02  | 1,41  | 0     |
| 1031,3  | 339,61 | 0,1   | 0,07  | 0,15  | 0     |
| 3469,4  | 203    | 2,03  | 0,1   | 3,3   | 13,91 |

|         |        |       |      |       |       |
|---------|--------|-------|------|-------|-------|
| 1952,48 | 224,03 | 0,42  | 0,26 | 8,28  | 55,29 |
| 455,7   | 285,71 | 0,93  | 0,18 | 9,33  | 37,35 |
| 1400,1  | 139,06 | 1,72  | 0,62 | 7,62  | 16,66 |
| 4697,6  | 107,77 | 3,29  | 0,25 | 9,2   | 43,26 |
| 1376,3  | 340,97 | 0,75  | 0,04 | 8,07  | 24,72 |
| 2844,5  | 0      | 0     | 0    | 9,02  | 30,09 |
| 3864,3  | 303,01 | 1,33  | 0,09 | 8,97  | 41,63 |
| 2209,6  | 191,1  | 2,56  | 0,84 | 8,7   | 21,82 |
| 2078,7  | 151,34 | 1,18  | 0,26 | 4,98  | 7,8   |
| 979,5   | 248,19 | 0,37  | 0,43 | 7,22  | 6,37  |
| 852,5   | 119,88 | 1,86  | 0,72 | 7,76  | 18,94 |
| 558,9   | 94,06  | 1,85  | 0,93 | 8,49  | 21,42 |
| 983,5   | 136,08 | 2,26  | 1    | 8,86  | 11,02 |
| 3800,8  | 56,76  | 6,55  | 1,04 | 6,71  | 4,3   |
| 1658    | 618,14 | 0,33  | 0,03 | 7,42  | 14,24 |
| 769,2   | 141,24 | 0,33  | 0,54 | 5,45  | 0     |
| 931,9   | 142,69 | 1,94  | 0,66 | 6,49  | 14,53 |
| 201,7   | 201,59 | 0,2   | 0    | 9     | 22,53 |
| 598,6   | 72,35  | 0,96  | 0,87 | 8,77  | 23,94 |
| 5324,6  | 197,9  | 2,28  | 0,33 | 10,22 | 39,19 |
| 2177,9  | 93,82  | 2,77  | 0,64 | 9,25  | 3,97  |
| 0       | 85,93  | 0,75  | 0,24 | 4,55  | 15,76 |
| 19,2    | 379,05 | 0,06  | 0    | 6,91  | 16,89 |
| 947,7   | 187,82 | 1,87  | 0,68 | 10,21 | 22,78 |
| 1102,5  | 68,24  | 2,66  | 1,1  | 9,8   | 17,85 |
| 765,2   | 106,6  | 1,67  | 0,65 | 8,96  | 33,27 |
| 3046,9  | 81,13  | 5,06  | 2,4  | 10,42 | 27,77 |
| 769,2   | 366,98 | 0,46  | 0,13 | 6,91  | 14,94 |
| 761,2   | 198,71 | 0,76  | 0,13 | 6,24  | 5,43  |
| 658,1   | 280,08 | 1,5   | 0,01 | 2,6   | 49,34 |
| 3979,4  | 54,61  | 4,4   | 2,61 | 5,21  | 34,01 |
| 0       | 180,39 | 0,3   | 0,08 | 3,56  | 36,54 |
| 0       | 314,93 | 0,04  | 0,03 | 3,95  | 24,89 |
| 118,4   | 263,79 | 0,14  | 0,06 | 3,75  | 1,28  |
| 495,4   | 210,79 | 0,47  | 0,59 | 5,88  | 0,32  |
| 6550,7  | 26,12  | 19,54 | 2,66 | 9,46  | 16,18 |
| 0       | 201,47 | 0,14  | 0,13 | 6,67  | 10,3  |
| 269,2   | 162,82 | 0,18  | 0,1  | 6,21  | 7,21  |
| 0       | 49,14  | 0,72  | 1,55 | 3,85  | 2,82  |
| 1983,4  | 57,24  | 2,89  | 0,47 | 8,48  | 8,14  |
| 1427,9  | 256,87 | 1,33  | 0,24 | 6,32  | 8,52  |
| 3432,9  | 291,64 | 2,12  | 0,19 | 11,42 | 27,51 |
| 480,8   | 104,68 | 0,74  | 0,55 | 3,78  | 9,59  |
| 734,1   | 267,21 | 0,16  | 0,1  | 6,16  | 9,13  |
| 1095,8  | 92,42  | 3,8   | 1,06 | 8,77  | 16,1  |
| 1207,6  | 64,7   | 3,89  | 1,93 | 9,38  | 9,14  |
| 2317,3  | 146,31 | 2,2   | 0,88 | 11,17 | 13,74 |
| 963,6   | 138,31 | 0,69  | 0,89 | 7     | 8,42  |
| 1522,9  | 183,26 | 0,31  | 0,61 | 7,02  | 4,89  |
| 2514,8  | 211,52 | 2,51  | 1,27 | 12,32 | 19,34 |

|        |        |       |      |       |       |
|--------|--------|-------|------|-------|-------|
| 562,6  | 84,15  | 0,47  | 0,46 | 7,16  | 22,43 |
| 1918,6 | 702    | 0,18  | 0,15 | 9,16  | 28,36 |
| 1055,9 | 80,09  | 3,65  | 1,18 | 10,66 | 15,31 |
| 1778,8 | 108,43 | 2,28  | 0,24 | 12,16 | 14,39 |
| 2024,1 | 164,57 | 1,09  | 0,25 | 13,33 | 11,89 |
| 647    | 156,49 | 0,32  | 0,22 | 8,6   | 5,98  |
| 565,3  | 240,14 | 0,16  | 0,21 | 10,97 | 4,87  |
| 5319,1 | 185,21 | 3,43  | 1,05 | 15,61 | 26,54 |
| 3287,8 | 95,53  | 3,56  | 0,53 | 11,58 | 15,45 |
| 1855,3 | 71,07  | 2,88  | 1,23 | 10,74 | 18,31 |
| 1343,5 | 92,95  | 1,48  | 1    | 13,79 | 9,12  |
| 504,6  | 123,23 | 0,31  | 0,29 | 9,22  | 4,9   |
| 567,9  | 150,13 | 0,57  | 0,58 | 12,44 | 8,11  |
| 1517,6 | 178,92 | 0,74  | 0,51 | 10,86 | 12,46 |
| 902,9  | 180,52 | 0,39  | 0,33 | 7,66  | 22,07 |
| 1016,4 | 266,17 | 0,61  | 0,29 | 9,15  | 32,08 |
| 1456,9 | 129,83 | 2,82  | 1,13 | 13,67 | 36,99 |
| 1773,5 | 224,2  | 0,82  | 0,29 | 11,32 | 35,84 |
| 1797,2 | 63,28  | 3,62  | 0,48 | 11,99 | 30,9  |
| 2216,7 | 181,8  | 2,01  | 0,07 | 10,08 | 2,14  |
| 3055,6 | 51,39  | 8,78  | 2,22 | 15,65 | 15,73 |
| 4904,9 | 25,06  | 20,43 | 7,57 | 14,28 | 13,21 |
| 1639   | 212,49 | 0,91  | 0,62 | 18,54 | 27,57 |
| 2564,9 | 147,46 | 2,73  | 0,41 | 13,83 | 14,01 |
| 3163,8 | 144,91 | 2,73  | 0,77 | 9,99  | 32,85 |
| 1079,7 | 95,99  | 3,81  | 1,25 | 9,08  | 7,88  |
| 2311,7 | 106,52 | 1,07  | 1,73 | 8,87  | 0     |
| 2124,4 | 140,86 | 4,14  | 0,92 | 10,18 | 30,4  |
| 1106,1 | 244,53 | 1,96  | 0,38 | 9,81  | 10,37 |
| 1063,9 | 132,77 | 4,31  | 0,87 | 9,12  | 26,84 |
| 3555,6 | 87,08  | 6,74  | 0,89 | 13,65 | 22,98 |
| 1246,7 | 225,14 | 0,67  | 0,08 | 10,66 | 12,54 |
| 989,6  | 96,59  | 0,27  | 0,48 | 8,45  | 12,84 |
| 665,3  | 353,84 | 0,08  | 0,23 | 13,75 | 19,21 |
| 1551,4 | 402,1  | 0,23  | 0,05 | 10,68 | 24,13 |
| 3463,4 | 81,62  | 2,44  | 1,45 | 14,17 | 26,91 |
| 2090,9 | 100,76 | 2,4   | 1,33 | 6,19  | 2,14  |
| 623,4  | 327,62 | 0,08  | 0,11 | 0,84  | 4,77  |
| 1397,7 | 175,09 | 1,59  | 0,59 | 16,37 | 6,12  |
| 1302,6 | 215,26 | 0,42  | 0,32 | 10,17 | 6,17  |
| 1431,2 | 152,81 | 0,74  | 0,83 | 12,63 | 15,97 |
| 1011,9 | 154,21 | 1,13  | 0,32 | 10,39 | 9,06  |
| 2135,6 | 310,96 | 0,29  | 0,29 | 12,74 | 12,06 |
| 1003,5 | 163,14 | 0,41  | 0,67 | 11,66 | 16,57 |
| 1453,6 | 173,8  | 0,29  | 0,32 | 6,45  | 29,4  |
| 522,8  | 200,34 | 0,07  | 0,07 | 6,36  | 21,76 |
| 2015,4 | 262,03 | 0,78  | 0,53 | 9,19  | 18,38 |
| 2350,9 | 285,93 | 0,91  | 0    | 11,42 | 21,93 |
| 2996,6 | 209,79 | 1,23  | 0,43 | 14,58 | 7,24  |
| 3471,7 | 130,36 | 2,8   | 0,83 | 9,34  | 8,72  |



|        |        |       |      |       |       |
|--------|--------|-------|------|-------|-------|
| 698,9  | 435,63 | 0,05  | 0,07 | 5,05  | 0,3   |
| 167,8  | 337,31 | 0,07  | 0,01 | 4,29  | 2,87  |
| 2334,1 | 629,58 | 0,58  | 0,16 | 9,02  | 3,27  |
| 2247,4 | 362,35 | 0,79  | 0,5  | 13,76 | 4,68  |
| 4701,7 | 355,09 | 1,29  | 0,03 | 3,4   | 3,43  |
| 525,6  | 199,38 | 0,42  | 0    | 0,69  | 0     |
| 936,5  | 170,17 | 0,12  | 0,4  | 2,31  | 0     |
| 2532,5 | 103,5  | 1,51  | 2,1  | 10,39 | 2,21  |
| 3153,1 | 403,35 | 0,9   | 0,25 | 10,96 | 2,61  |
| 2381,6 | 203,73 | 0,51  | 0,38 | 11,94 | 1,97  |
| 2417,9 | 279,87 | 1,64  | 1,33 | 12,3  | 5,03  |
| 1752,7 | 331,21 | 0,55  | 0,15 | 16,12 | 1,57  |
| 2185,9 | 181,54 | 1,86  | 0,48 | 4,28  | 12,33 |
| 7086   | 146,67 | 3,85  | 0,65 | 13,98 | 4,67  |
| 1610,1 | 217,94 | 1,24  | 0,35 | 4,41  | 0     |
| 5475,9 | 148,96 | 0,99  | 0,67 | 14,08 | 4,83  |
| 1011,9 | 255,66 | 0,07  | 0,07 | 8,86  | 0,2   |
| 1475,9 | 310,54 | 1,03  | 0,29 | 4,1   | 0     |
| 964,5  | 257,22 | 0,76  | 0,29 | 9,17  | 0,9   |
| 944,9  | 457,46 | 0,12  | 0,17 | 12,89 | 4,54  |
| 37,1   | 221,96 | 0,04  | 0    | 3,95  | 4,54  |
| 1346,5 | 273    | 0,49  | 0,31 | 12,88 | 8     |
| 2397,9 | 119,64 | 3,93  | 1,4  | 7,59  | 9,59  |
| 908,9  | 390,04 | 0,3   | 0,18 | 14,3  | 23,03 |
| 3153,1 | 396,11 | 0,84  | 0,01 | 8,32  | 16,1  |
| 6577,3 | 422,86 | 1,09  | 0,51 | 11,88 | 12,52 |
| 3733,3 | 132,79 | 3,49  | 3,42 | 17,25 | 29,83 |
| 1225,7 | 529,75 | 0,16  | 0,06 | 5,74  | 15,84 |
| 804,5  | 549,09 | 0,02  | 0,06 | 7     | 0,69  |
| 624,9  | 385,9  | 0,04  | 0    | 4,89  | 3,8   |
| 2727,7 | 253,09 | 0,93  | 0,06 | 5,14  | 0     |
| 2009,3 | 411,44 | 0,86  | 0,36 | 8,65  | 6,66  |
| 2636,2 | 417,64 | 0,8   | 0,19 | 19,43 | 18,41 |
| 6590,4 | 542,91 | 0,88  | 0,14 | 10,45 | 7,66  |
| 5963,5 | 41,7   | 11,41 | 1,24 | 11,67 | 5,18  |
| 3769,3 | 95,79  | 4,61  | 0,2  | 2,69  | 1,53  |
| 1023,2 | 266,65 | 1,46  | 0,52 | 2,88  | 11,58 |
| 3321,9 | 426,04 | 1,09  | 0,34 | 14,06 | 10    |
| 2616,6 | 322,18 | 0,37  | 0,25 | 6,43  | 3,58  |
| 5561,9 | 165,06 | 3,04  | 0,34 | 5,4   | 4,82  |
| 1979,9 | 395,7  | 0,62  | 0,11 | 4,63  | 5,79  |
| 1532,6 | 473,25 | 0,89  | 0,19 | 8,55  | 1,78  |
| 2169,3 | 262,11 | 1,56  | 0,25 | 2,13  | 3,76  |
| 1483,6 | 609,43 | 0,27  | 0,12 | 10,84 | 3,71  |
| 1016,7 | 342,25 | 0,06  | 0,25 | 3,25  | 0     |
| 1023,2 | 319,05 | 0,55  | 0,31 | 7,23  | 1,96  |
| 1016,7 | 246,65 | 1,23  | 0,19 | 1,7   | 0     |
| 739,2  | 383,91 | 0,43  | 0,39 | 2,83  | 0     |
| 2241,1 | 85,43  | 3,75  | 1,83 | 13,44 | 4,74  |
| 1137,5 | 262,78 | 1,37  | 0,3  | 10,1  | 5,33  |

|        |        |      |      |       |       |
|--------|--------|------|------|-------|-------|
| 76,3   | 104,54 | 0,05 | 0,05 | 5,53  | 0     |
| 651    | 311,03 | 0,69 | 0,17 | 7,12  | 2,09  |
| 2019,1 | 180,25 | 1,17 | 0,84 | 13,85 | 3,55  |
| 1268,1 | 140,06 | 1,04 | 0,53 | 3,42  | 0     |
| 1101,6 | 145,88 | 0,45 | 0,23 | 2,14  | 0     |
| 1526,1 | 152,85 | 0,84 | 0,23 | 4,22  | 0     |
| 2815,8 | 196,09 | 1,47 | 0    | 3,56  | 7,13  |
| 3139,1 | 268,58 | 1,82 | 0    | 10,18 | 4,24  |
| 4921,9 | 166,04 | 4,65 | 0,71 | 3,14  | 0     |
| 823,9  | 407,34 | 0,09 | 0,34 | 10,49 | 0     |
| 1427,4 | 128,25 | 0,36 | 0,9  | 7,44  | 0     |
| 1156,2 | 294,84 | 0,97 | 0,1  | 3,79  | 0     |
| 1289,2 | 109,58 | 1,36 | 0,67 | 2,1   | 0     |
| 1095,1 | 262,09 | 0,24 | 0,4  | 8,53  | 0     |
| 1065,8 | 469,99 | 0,25 | 0,2  | 0,66  | 70,16 |
| 1778,4 | 485,11 | 0,35 | 0,13 | 0     | 100   |
| 1733,2 | 343,18 | 1,46 | 0,04 | 0     | 100   |
| 1746,5 | 116,53 | 2,82 | 1,21 | 0,26  | 29,91 |
| 1140,3 | 334,95 | 0,13 | 0,32 | 0,15  | 0     |
| 895,7  | 231,31 | 0,08 | 0,62 | 5,83  | 10,8  |
| 760,1  | 266,95 | 0,32 | 0,27 | 4,31  | 1,24  |
| 760,1  | 255,88 | 0,08 | 0,16 | 2,88  | 6,43  |
| 2504,2 | 316,16 | 0,56 | 0,74 | 1,99  | 35,81 |
| 1512,5 | 251,27 | 0,18 | 0,58 | 1,61  | 29,65 |
| 688,3  | 180,23 | 0,03 | 0,15 | 2,79  | 1,48  |
| 3703,3 | 239,17 | 2,05 | 0,17 | 11,71 | 28,3  |
| 869,1  | 237,74 | 0,02 | 0,23 | 9,03  | 7,47  |
| 2068,2 | 433    | 0,68 | 0,27 | 12,35 | 21,59 |
| 1382,2 | 173,39 | 0,63 | 0,06 | 5,97  | 11,22 |
| 1613,5 | 322,44 | 1,07 | 0,21 | 8,02  | 24,09 |
| 2150,6 | 257,93 | 1,76 | 0,81 | 9,18  | 24,12 |
| 2331,4 | 247,83 | 0,61 | 0,71 | 5,83  | 10,37 |
| 2775,4 | 159,63 | 1,47 | 0,55 | 7,76  | 8,27  |
| 3067,9 | 117,7  | 3,17 | 0,34 | 4,55  | 21,26 |
| 7311,3 | 325,19 | 1,63 | 0,03 | 1,11  | 0     |
| 2363,3 | 362,2  | 0,86 | 0,01 | 3,68  | 0     |
| 1799,7 | 230,19 | 1,47 | 0,54 | 6,24  | 0,31  |
| 624,5  | 197,64 | 0,49 | 0,19 | 1,81  | 9,93  |
| 1666,7 | 285,76 | 1,13 | 0,02 | 1,03  | 19,03 |
| 512,8  | 272,08 | 0,04 | 0    | 0,23  | 1,8   |
| 2262,3 | 174,28 | 2,16 | 1,11 | 3,57  | 8,53  |
| 1065,8 | 318,27 | 0,15 | 0,01 | 2,04  | 5,91  |
| 730,8  | 196,75 | 0,06 | 0    | 0,99  | 0     |
| 2387,2 | 236,83 | 1,96 | 0,03 | 2,51  | 0     |
| 1438,1 | 344,26 | 0,05 | 0,06 | 0,36  | 0     |
| 3299,2 | 154,67 | 3,18 | 0,41 | 0,56  | 32,24 |
| 3251,4 | 290,08 | 1,47 | 0,06 | 3,46  | 20,77 |
| 3870,8 | 55,97  | 9,16 | 5,19 | 4,55  | 21,26 |
| 2554,8 | 294,76 | 1,15 | 0,18 | 3,95  | 0,94  |
| 4075,6 | 468,27 | 1,14 | 0,02 | 6,98  | 28,83 |

|         |       |      |      |      |      |
|---------|-------|------|------|------|------|
| 1537,76 | 267,6 | 0,75 | 0,75 | 6,22 | 6,35 |
|---------|-------|------|------|------|------|
